# Supplementary material
Source: PubMed Central journal article supplement (PMC5679409)

## SUPPLEMENTARY MATERIAL

**Supplemental Table 1:** Echocardiograph data: Male (blue) & Female (pink) rats.

| <b>Animal ID</b> | <b>LVAW;d<br/>(cm)<br/>avg</b> | <b>LVID;d<br/>(cm)<br/>avg</b> | <b>LVPW;d<br/>(cm)<br/>avg</b> | <b>LVAW;s<br/>(cm)<br/>avg</b> | <b>LVID;s<br/>(cm)<br/>avg</b>     | <b>LVPW;s<br/>(cm)<br/>avg</b>  |
|------------------|--------------------------------|--------------------------------|--------------------------------|--------------------------------|------------------------------------|---------------------------------|
| Male 1           | 0.118                          | 0.801                          | 0.114                          | 0.229                          | 0.479                              | 0.195                           |
| Male 2           | 0.114                          | 0.831                          | 0.136                          | 0.263                          | 0.470                              | 0.242                           |
| Male 3           | 0.140                          | 0.864                          | 0.131                          | 0.263                          | 0.547                              | 0.220                           |
| Male 4           | 0.123                          | 0.805                          | 0.136                          | 0.216                          | 0.491                              | 0.246                           |
| Male 5           | 0.127                          | 0.733                          | 0.127                          | 0.246                          | 0.377                              | 0.254                           |
| Male 6           | 0.136                          | 0.826                          | 0.140                          | 0.280                          | 0.474                              | 0.204                           |
| Female 7         | 0.127                          | 0.784                          | 0.127                          | 0.220                          | 0.466                              | 0.242                           |
| Female 8         | 0.140                          | 0.695                          | 0.144                          | 0.301                          | 0.305                              | 0.275                           |
| Female 9         | 0.140                          | 0.670                          | 0.153                          | 0.242                          | 0.309                              | 0.326                           |
| Female 10        | 0.144                          | 0.652                          | 0.153                          | 0.288                          | 0.301                              | 0.258                           |
| Female 11        | 0.114                          | 0.767                          | 0.118                          | 0.263                          | 0.398                              | 0.233                           |
| <b>Animal ID</b> | <b>LV Vol;d<br/>(ul)</b>       | <b>LV Vol;s<br/>(ul)</b>       | <b>%EF</b>                     | <b>%FS</b>                     | <b>Body<br/>Weight<br/>(grams)</b> | <b>Heart<br/>Rate<br/>(bpm)</b> |
| Male 1           | 345.6                          | 106.8                          | 69.1                           | 40.2                           | 331                                | 383                             |
| Male 2           | 374.7                          | 102.4                          | 72.7                           | 43.4                           | 336                                | 419                             |
| Male 3           | 409.3                          | 145.4                          | 64.5                           | 36.8                           | 423                                | 340                             |
| Male 4           | 349.8                          | 113.5                          | 67.5                           | 39.0                           | 400                                | 360                             |
| Male 5           | 283.3                          | 60.8                           | 78.5                           | 48.6                           | 382                                | 400                             |
| Male 6           | 370.4                          | 104.6                          | 71.8                           | 42.6                           | 385                                | 336                             |
| Female 7         | 329.1                          | 100.3                          | 69.5                           | 40.5                           | 313                                | 356                             |
| Female 8         | 251.1                          | 36.4                           | 85.5                           | 56.1                           | 313                                | 364                             |
| Female 9         | 231.1                          | 37.7                           | 83.7                           | 53.8                           | 321                                | 340                             |
| Female 10        | 217.8                          | 35.2                           | 83.8                           | 53.9                           | 322                                | 333                             |
| Female 11        | 313.7                          | 69.2                           | 77.9                           | 48.1                           | 318                                | 343                             |

**Supplemental Table 2:** Overall RNA-sequencing mapping statistics: Male (blue) & Female (pink) ARVMs.

| <b>Sample</b> | <b># reads mapped</b> | <b>Overall mapping rate</b> |
|---------------|-----------------------|-----------------------------|
| Male 1        | 138611090             | 81.60%                      |
| Male 2        | 144741248             | 82.30%                      |
| Male 3        | 133684910             | 82.40%                      |
| Male 4        | 158742168             | 80.60%                      |
| Male 5        | 169837416             | 80.50%                      |
| Male 6        | 168417496             | 80.90%                      |
| Female 7      | 158436486             | 81.40%                      |
| Female 8      | 166296856             | 82.10%                      |
| Female 9      | 189128974             | 82.90%                      |
| Female 10     | 150660844             | 81.80%                      |
| Female 11     | 149957806             | 82.40%                      |

**Supplemental Table 3: DESeq Results of Genes Enriched in Female Myocytes Analyzed with IPA**

| <b>id</b>        | <b>baseMean</b> | <b>baseMean Male</b> | <b>baseMean Female</b> | <b>Fold Change</b> | <b>padj</b> |
|------------------|-----------------|----------------------|------------------------|--------------------|-------------|
| <b>LOC310926</b> | 4966.97         | 1981.27              | 8549.81                | 4.32               | 0.0015777   |
| <b>Irs3</b>      | 38.22           | 15.55                | 65.42                  | 4.21               | 0.0005077   |
| <b>Ier5l</b>     | 151.38          | 80.04                | 236.98                 | 2.96               | 0.0058676   |
| <b>Krt19</b>     | 87.26           | 48.86                | 133.34                 | 2.73               | 0.0004359   |
| <b>Ass1</b>      | 59.91           | 33.59                | 91.49                  | 2.72               | 0.0015537   |
| <b>Map1s</b>     | 247.48          | 139.59               | 376.95                 | 2.70               | 0.0011758   |
| <b>Cyp2e1</b>    | 610.56          | 344.76               | 929.51                 | 2.70               | 0.0018117   |
| <b>Lrg1</b>      | 124.00          | 70.42                | 188.29                 | 2.67               | 0.0004906   |
| <b>Hist2h4</b>   | 2351.35         | 1341.05              | 3563.72                | 2.66               | 0.0095554   |
| <b>Dmtn</b>      | 64.13           | 36.99                | 96.70                  | 2.61               | 0.0026601   |
| <b>Csdc2</b>     | 880.89          | 509.81               | 1326.19                | 2.60               | 0.0001383   |
| <b>Jak3</b>      | 101.77          | 61.64                | 149.93                 | 2.43               | 0.0007862   |
| <b>C4a</b>       | 2297.39         | 1417.16              | 3353.66                | 2.37               | 0.0000003   |
| <b>Srebf1</b>    | 422.08          | 264.04               | 611.73                 | 2.32               | 0.0034352   |
| <b>Gtpbp1</b>    | 1887.40         | 1186.78              | 2728.14                | 2.30               | 0.0002246   |
| <b>Klf2</b>      | 213.17          | 135.43               | 306.46                 | 2.26               | 0.0000663   |
| <b>Hlx</b>       | 170.83          | 108.72               | 245.36                 | 2.26               | 0.0036625   |
| <b>Foxk1</b>     | 102.70          | 65.89                | 146.86                 | 2.23               | 0.0026472   |
| <b>Fmnl1</b>     | 129.08          | 84.26                | 182.86                 | 2.17               | 0.0014778   |
| <b>Irf2bp1</b>   | 313.90          | 205.73               | 443.70                 | 2.16               | 0.0009671   |
| <b>Nr4a1</b>     | 1218.78         | 800.13               | 1721.16                | 2.15               | 0.0000018   |
| <b>Msln</b>      | 168.75          | 110.79               | 238.29                 | 2.15               | 0.0018117   |
| <b>Hsf4</b>      | 163.37          | 108.35               | 229.40                 | 2.12               | 0.0008068   |
| <b>Repin1</b>    | 182.42          | 121.77               | 255.20                 | 2.10               | 0.0007089   |
| <b>Pdxp</b>      | 265.31          | 178.00               | 370.08                 | 2.08               | 0.0000566   |
| <b>Ap5s1</b>     | 99.55           | 67.08                | 138.50                 | 2.06               | 0.0057430   |
| <b>Pla2g15</b>   | 143.39          | 96.93                | 199.13                 | 2.05               | 0.0038522   |
| <b>Hspa12b</b>   | 355.52          | 240.72               | 493.28                 | 2.05               | 0.0001502   |
| <b>Ahdc1</b>     | 697.00          | 472.02               | 966.97                 | 2.05               | 0.0000398   |
| <b>Hspbp1</b>    | 257.09          | 174.73               | 355.91                 | 2.04               | 0.0004972   |
| <b>Hist1h1d</b>  | 1070.62         | 731.32               | 1477.78                | 2.02               | 0.0022051   |
| <b>Trim11</b>    | 458.01          | 314.26               | 630.51                 | 2.01               | 0.0001779   |
| <b>Cad</b>       | 386.05          | 265.68               | 530.48                 | 2.00               | 0.0001637   |
| <b>Prrc2a</b>    | 2456.33         | 1694.21              | 3370.88                | 1.99               | 0.0009891   |
| <b>Lrch4</b>     | 196.18          | 135.36               | 269.17                 | 1.99               | 0.0020836   |

|                 |         |         |         |      |           |
|-----------------|---------|---------|---------|------|-----------|
| <b>Pom121</b>   | 178.61  | 123.37  | 244.91  | 1.99 | 0.0015326 |
| <b>Wnk2</b>     | 2217.76 | 1537.18 | 3034.45 | 1.97 | 0.0010445 |
| <b>Synpo</b>    | 1663.05 | 1156.93 | 2270.39 | 1.96 | 0.0000002 |
| <b>Vps18</b>    | 702.44  | 489.16  | 958.38  | 1.96 | 0.0005932 |
| <b>Shroom3</b>  | 3189.10 | 2222.49 | 4349.03 | 1.96 | 0.0057986 |
| <b>Ucp2</b>     | 4767.36 | 3335.78 | 6485.26 | 1.94 | 0.0002383 |
| <b>Dyrk1b</b>   | 431.10  | 301.67  | 586.43  | 1.94 | 0.0004970 |
| <b>Fmo1</b>     | 832.83  | 585.30  | 1129.86 | 1.93 | 0.0013310 |
| <b>Rfx1</b>     | 118.48  | 83.31   | 160.69  | 1.93 | 0.0067773 |
| <b>Cbx7</b>     | 287.45  | 202.26  | 389.68  | 1.93 | 0.0002621 |
| <b>Ptpn23</b>   | 190.38  | 134.08  | 257.94  | 1.92 | 0.0018117 |
| <b>Tbc1d25</b>  | 138.42  | 97.61   | 187.39  | 1.92 | 0.0034627 |
| <b>Atg2a</b>    | 1009.88 | 713.06  | 1366.07 | 1.92 | 0.0009257 |
| <b>Rbm42</b>    | 505.05  | 357.00  | 682.72  | 1.91 | 0.0004019 |
| <b>Nkx2-5</b>   | 496.10  | 352.69  | 668.19  | 1.89 | 0.0021998 |
| <b>Alpl</b>     | 1176.42 | 836.89  | 1583.86 | 1.89 | 0.0016943 |
| <b>Rbm14</b>    | 381.84  | 271.75  | 513.94  | 1.89 | 0.0001771 |
| <b>Dyrk3</b>    | 382.70  | 272.48  | 514.97  | 1.89 | 0.0013722 |
| <b>Adamts14</b> | 1269.81 | 904.72  | 1707.91 | 1.89 | 0.0000072 |
| <b>Tysnd1</b>   | 203.18  | 145.08  | 272.89  | 1.88 | 0.0091168 |
| <b>Bcas3</b>    | 991.92  | 709.06  | 1331.35 | 1.88 | 0.0001807 |
| <b>Zbtb45</b>   | 248.13  | 177.49  | 332.89  | 1.88 | 0.0009444 |
| <b>Apoe</b>     | 1683.76 | 1206.37 | 2256.63 | 1.87 | 0.0000018 |
| <b>Vasn</b>     | 337.50  | 242.65  | 451.33  | 1.86 | 0.0005109 |
| <b>Cnksr1</b>   | 295.55  | 212.66  | 395.02  | 1.86 | 0.0073094 |
| <b>Nckipsd</b>  | 238.27  | 172.26  | 317.48  | 1.84 | 0.0011869 |
| <b>Zfp691</b>   | 450.16  | 325.54  | 599.71  | 1.84 | 0.0001271 |
| <b>Ier2</b>     | 3210.18 | 2327.61 | 4269.26 | 1.83 | 0.0000997 |
| <b>Por</b>      | 2554.08 | 1853.27 | 3395.06 | 1.83 | 0.0000011 |
| <b>Mn1</b>      | 473.21  | 343.65  | 628.68  | 1.83 | 0.0025134 |
| <b>Bcl9l</b>    | 228.92  | 166.26  | 304.10  | 1.83 | 0.0017006 |
| <b>Zfp423</b>   | 766.65  | 557.32  | 1017.85 | 1.83 | 0.0000318 |
| <b>Foxp3</b>    | 152.72  | 111.17  | 202.58  | 1.82 | 0.0063802 |
| <b>Zfp142</b>   | 758.79  | 552.73  | 1006.07 | 1.82 | 0.0000412 |
| <b>Cx3cl1</b>   | 590.16  | 430.43  | 781.84  | 1.82 | 0.0061491 |
| <b>Tll12</b>    | 490.81  | 358.43  | 649.68  | 1.81 | 0.0003050 |
| <b>Tapbp</b>    | 534.99  | 391.11  | 707.64  | 1.81 | 0.0011016 |
| <b>Notch2</b>   | 193.60  | 141.67  | 255.92  | 1.81 | 0.0092680 |
| <b>Llgl2</b>    | 318.57  | 233.99  | 420.06  | 1.80 | 0.0025246 |
| <b>Jrk</b>      | 185.49  | 136.33  | 244.48  | 1.79 | 0.0062767 |

|                |          |         |          |      |           |
|----------------|----------|---------|----------|------|-----------|
| <b>Sts</b>     | 1829.12  | 1344.76 | 2410.36  | 1.79 | 0.0038522 |
| <b>Disp1</b>   | 422.93   | 311.16  | 557.05   | 1.79 | 0.0030036 |
| <b>Arc</b>     | 280.94   | 206.72  | 370.00   | 1.79 | 0.0039291 |
| <b>Wdr81</b>   | 171.26   | 126.14  | 225.41   | 1.79 | 0.0084591 |
| <b>Ncln</b>    | 763.79   | 562.60  | 1005.23  | 1.79 | 0.0000846 |
| <b>Rhbdf1</b>  | 342.08   | 252.09  | 450.06   | 1.79 | 0.0008283 |
| <b>Pld1</b>    | 167.36   | 123.35  | 220.17   | 1.78 | 0.0062236 |
| <b>Dusp1</b>   | 7888.45  | 5818.91 | 10371.90 | 1.78 | 0.0021166 |
| <b>Dok7</b>    | 281.83   | 208.17  | 370.22   | 1.78 | 0.0020836 |
| <b>Entpd6</b>  | 681.19   | 503.60  | 894.30   | 1.78 | 0.0010185 |
| <b>Eif3f</b>   | 2935.95  | 2171.79 | 3852.94  | 1.77 | 0.0005729 |
| <b>Usp19</b>   | 3424.28  | 2533.41 | 4493.32  | 1.77 | 0.0000602 |
| <b>Itga7</b>   | 12222.02 | 9047.05 | 16031.98 | 1.77 | 0.0000010 |
| <b>Angel1</b>  | 253.30   | 187.52  | 332.22   | 1.77 | 0.0028404 |
| <b>Pelp1</b>   | 577.52   | 427.89  | 757.07   | 1.77 | 0.0005907 |
| <b>Acacb</b>   | 12369.68 | 9197.83 | 16175.91 | 1.76 | 0.0000487 |
| <b>Rnf31</b>   | 658.54   | 490.34  | 860.39   | 1.75 | 0.0001205 |
| <b>Tle2</b>    | 156.32   | 116.52  | 204.09   | 1.75 | 0.0091651 |
| <b>Slc9a1</b>  | 195.83   | 146.17  | 255.43   | 1.75 | 0.0059849 |
| <b>Leng8</b>   | 392.02   | 292.76  | 511.12   | 1.75 | 0.0010185 |
| <b>Lipe</b>    | 782.91   | 585.25  | 1020.10  | 1.74 | 0.0015777 |
| <b>Junb</b>    | 12353.42 | 9242.11 | 16086.99 | 1.74 | 0.0000164 |
| <b>Jup</b>     | 6832.24  | 5115.99 | 8891.73  | 1.74 | 0.0014360 |
| <b>Cyr61</b>   | 9796.03  | 7336.95 | 12746.93 | 1.74 | 0.0078171 |
| <b>Exosc4</b>  | 184.46   | 138.27  | 239.90   | 1.73 | 0.0065813 |
| <b>Tacc2</b>   | 11374.34 | 8533.74 | 14783.06 | 1.73 | 0.0000846 |
| <b>Colq</b>    | 534.61   | 401.26  | 694.62   | 1.73 | 0.0003054 |
| <b>Stard10</b> | 654.23   | 491.23  | 849.83   | 1.73 | 0.0004818 |
| <b>Xab2</b>    | 560.68   | 421.42  | 727.79   | 1.73 | 0.0004893 |
| <b>Fbxw8</b>   | 344.80   | 259.17  | 447.56   | 1.73 | 0.0049104 |
| <b>Cog1</b>    | 1120.34  | 842.86  | 1453.32  | 1.72 | 0.0001174 |
| <b>Skiv2l</b>  | 646.34   | 486.81  | 837.78   | 1.72 | 0.0055629 |
| <b>Akap17a</b> | 780.89   | 588.33  | 1011.95  | 1.72 | 0.0003054 |
| <b>Scaf1</b>   | 428.64   | 323.27  | 555.09   | 1.72 | 0.0020843 |
| <b>Cand2</b>   | 3175.63  | 2397.18 | 4109.78  | 1.71 | 0.0010094 |
| <b>Nup210</b>  | 209.05   | 157.83  | 270.52   | 1.71 | 0.0095717 |
| <b>Rabac1</b>  | 669.20   | 505.43  | 865.73   | 1.71 | 0.0006364 |
| <b>Cul9</b>    | 454.58   | 343.47  | 587.90   | 1.71 | 0.0012043 |
| <b>Pld3</b>    | 225.04   | 170.06  | 291.03   | 1.71 | 0.0076451 |
| <b>Corin</b>   | 4434.66  | 3351.73 | 5734.17  | 1.71 | 0.0000836 |

|                   |          |          |          |      |           |
|-------------------|----------|----------|----------|------|-----------|
| <b>Pc</b>         | 1101.73  | 833.13   | 1424.05  | 1.71 | 0.0001381 |
| <b>Nfatc1</b>     | 194.57   | 147.50   | 251.06   | 1.70 | 0.0089538 |
| <b>Tmem214</b>    | 921.65   | 698.75   | 1189.13  | 1.70 | 0.0001862 |
| <b>Wbp2</b>       | 558.11   | 423.19   | 720.02   | 1.70 | 0.0009811 |
| <b>Tjap1</b>      | 241.14   | 182.87   | 311.08   | 1.70 | 0.0074443 |
| <b>Trappc9</b>    | 623.56   | 473.47   | 803.68   | 1.70 | 0.0020154 |
| <b>Edc4</b>       | 1140.85  | 866.48   | 1470.10  | 1.70 | 0.0005537 |
| <b>Alg2</b>       | 417.47   | 317.25   | 537.75   | 1.70 | 0.0016396 |
| <b>Zswim8</b>     | 1207.02  | 918.80   | 1552.89  | 1.69 | 0.0035975 |
| <b>Pcsk6</b>      | 4966.14  | 3782.43  | 6386.60  | 1.69 | 0.0000179 |
| <b>Dus3l</b>      | 363.22   | 276.71   | 467.03   | 1.69 | 0.0066067 |
| <b>Zfp36</b>      | 18483.42 | 14086.77 | 23759.40 | 1.69 | 0.0000412 |
| <b>Raver1</b>     | 618.81   | 471.63   | 795.43   | 1.69 | 0.0073094 |
| <b>Sympk</b>      | 1326.00  | 1012.46  | 1702.25  | 1.68 | 0.0022525 |
| <b>Asb2</b>       | 22066.09 | 16857.93 | 28315.89 | 1.68 | 0.0042776 |
| <b>Nfkb2</b>      | 1091.77  | 835.91   | 1398.80  | 1.67 | 0.0014360 |
| <b>Plbd2</b>      | 647.67   | 496.25   | 829.36   | 1.67 | 0.0014360 |
| <b>Rnf123</b>     | 2077.95  | 1593.32  | 2659.50  | 1.67 | 0.0018147 |
| <b>Gcat</b>       | 234.95   | 180.18   | 300.68   | 1.67 | 0.0084483 |
| <b>Aldoa</b>      | 65848.99 | 50502.46 | 84264.82 | 1.67 | 0.0022471 |
| <b>Pacs1</b>      | 504.63   | 387.07   | 645.69   | 1.67 | 0.0014237 |
| <b>Gcn1l1</b>     | 3575.62  | 2746.57  | 4570.49  | 1.66 | 0.0000846 |
| <b>Clcn6</b>      | 280.25   | 215.31   | 358.17   | 1.66 | 0.0059849 |
| <b>Zfp444</b>     | 320.13   | 246.06   | 409.01   | 1.66 | 0.0045219 |
| <b>RGD1310507</b> | 690.49   | 530.87   | 882.04   | 1.66 | 0.0003427 |
| <b>Foxj2</b>      | 1094.17  | 841.40   | 1397.50  | 1.66 | 0.0002873 |
| <b>Tbc1d17</b>    | 840.05   | 646.06   | 1072.85  | 1.66 | 0.0005932 |
| <b>Abcc8</b>      | 1287.31  | 990.33   | 1643.69  | 1.66 | 0.0002586 |
| <b>Fbxo31</b>     | 1327.99  | 1021.91  | 1695.29  | 1.66 | 0.0013144 |
| <b>Urgcp</b>      | 1863.01  | 1434.81  | 2376.86  | 1.66 | 0.0001262 |
| <b>Per1</b>       | 1123.76  | 865.59   | 1433.58  | 1.66 | 0.0002873 |
| <b>Mef2d</b>      | 2556.67  | 1970.43  | 3260.16  | 1.65 | 0.0000836 |
| <b>Slc9a8</b>     | 626.12   | 483.16   | 797.66   | 1.65 | 0.0010944 |
| <b>Lims2</b>      | 8916.32  | 6887.32  | 11351.12 | 1.65 | 0.0030369 |
| <b>Rela</b>       | 2072.55  | 1602.37  | 2636.76  | 1.65 | 0.0001381 |
| <b>Aarsd1</b>     | 1168.62  | 904.27   | 1485.84  | 1.64 | 0.0018117 |
| <b>Prpf8</b>      | 5560.18  | 4303.35  | 7068.39  | 1.64 | 0.0000566 |
| <b>Usp36</b>      | 962.86   | 745.30   | 1223.95  | 1.64 | 0.0007414 |
| <b>Slc27a1</b>    | 1802.51  | 1395.39  | 2291.05  | 1.64 | 0.0008854 |
| <b>Xbp1</b>       | 3072.25  | 2379.00  | 3904.14  | 1.64 | 0.0007944 |

|                |            |           |            |      |           |
|----------------|------------|-----------|------------|------|-----------|
| <b>Cpsf1</b>   | 825.87     | 640.04    | 1048.85    | 1.64 | 0.0009260 |
| <b>H6pd</b>    | 528.58     | 410.01    | 670.87     | 1.64 | 0.0018117 |
| <b>Tnrc18</b>  | 496.33     | 385.21    | 629.66     | 1.63 | 0.0029728 |
| <b>Tubb4b</b>  | 14426.12   | 11202.11  | 18294.94   | 1.63 | 0.0008283 |
| <b>Ptpns</b>   | 2351.31    | 1826.35   | 2981.25    | 1.63 | 0.0002180 |
| <b>Med25</b>   | 564.62     | 438.65    | 715.78     | 1.63 | 0.0032242 |
| <b>Usp10</b>   | 1875.43    | 1457.05   | 2377.48    | 1.63 | 0.0023089 |
| <b>Gstm2</b>   | 7663.64    | 5956.41   | 9712.32    | 1.63 | 0.0007944 |
| <b>Camta2</b>  | 535.28     | 416.12    | 678.26     | 1.63 | 0.0022983 |
| <b>Gaa</b>     | 4640.37    | 3608.89   | 5878.14    | 1.63 | 0.0001401 |
| <b>Plekhh3</b> | 638.21     | 496.42    | 808.35     | 1.63 | 0.0034953 |
| <b>Cnot3</b>   | 310.26     | 241.36    | 392.93     | 1.63 | 0.0063802 |
| <b>Npr2</b>    | 445.36     | 346.51    | 563.97     | 1.63 | 0.0026472 |
| <b>Inha</b>    | 2434.34    | 1894.50   | 3082.14    | 1.63 | 0.0099688 |
| <b>Myo18a</b>  | 3813.23    | 2969.35   | 4825.88    | 1.63 | 0.0011137 |
| <b>Ipo13</b>   | 2027.27    | 1578.81   | 2565.41    | 1.62 | 0.0031381 |
| <b>Tmem115</b> | 426.44     | 332.24    | 539.49     | 1.62 | 0.0032304 |
| <b>Mgp</b>     | 3511.77    | 2739.15   | 4438.92    | 1.62 | 0.0001977 |
| <b>Sf3a1</b>   | 2559.46    | 1996.92   | 3234.51    | 1.62 | 0.0002073 |
| <b>Fitm2</b>   | 9088.26    | 7091.57   | 11484.28   | 1.62 | 0.0001174 |
| <b>Mfge8</b>   | 4024.20    | 3140.49   | 5084.65    | 1.62 | 0.0011016 |
| <b>Pwwp2b</b>  | 506.67     | 395.47    | 640.12     | 1.62 | 0.0057430 |
| <b>Ech1</b>    | 23839.07   | 18612.98  | 30110.38   | 1.62 | 0.0000412 |
| <b>Acaa1a</b>  | 375.38     | 293.33    | 473.85     | 1.62 | 0.0066462 |
| <b>Rangap1</b> | 401.46     | 314.28    | 506.08     | 1.61 | 0.0055253 |
| <b>Afap1</b>   | 484.44     | 379.37    | 610.52     | 1.61 | 0.0042233 |
| <b>Mical1</b>  | 382.76     | 299.86    | 482.25     | 1.61 | 0.0090109 |
| <b>Hhatl</b>   | 5567.73    | 4363.99   | 7012.22    | 1.61 | 0.0001381 |
| <b>Oplah</b>   | 851.25     | 667.51    | 1071.75    | 1.61 | 0.0056711 |
| <b>Syde1</b>   | 745.28     | 584.53    | 938.19     | 1.61 | 0.0012051 |
| <b>Nfic</b>    | 379.05     | 297.33    | 477.12     | 1.60 | 0.0042522 |
| <b>Mapk12</b>  | 443.43     | 347.93    | 558.02     | 1.60 | 0.0032492 |
| <b>Rhbdd2</b>  | 488.64     | 383.47    | 614.84     | 1.60 | 0.0036379 |
| <b>Irgq</b>    | 561.53     | 440.71    | 706.53     | 1.60 | 0.0091168 |
| <b>Sema4b</b>  | 396.89     | 311.58    | 499.26     | 1.60 | 0.0064216 |
| <b>Plekhf1</b> | 844.16     | 662.75    | 1061.86    | 1.60 | 0.0046454 |
| <b>Atg9a</b>   | 2905.43    | 2281.22   | 3654.48    | 1.60 | 0.0008253 |
| <b>Agpat1</b>  | 711.21     | 558.56    | 894.39     | 1.60 | 0.0011758 |
| <b>Mocs1</b>   | 314.91     | 247.42    | 395.89     | 1.60 | 0.0079372 |
| <b>Myh6</b>    | 1058633.12 | 831770.67 | 1330868.07 | 1.60 | 0.0001174 |

|                |           |          |           |      |           |
|----------------|-----------|----------|-----------|------|-----------|
| <b>Tfeb</b>    | 704.83    | 553.82   | 886.05    | 1.60 | 0.0049511 |
| <b>Fam65a</b>  | 1111.00   | 873.35   | 1396.19   | 1.60 | 0.0008744 |
| <b>Pde4a</b>   | 449.05    | 353.08   | 564.21    | 1.60 | 0.0062027 |
| <b>Gga1</b>    | 1057.30   | 831.72   | 1328.01   | 1.60 | 0.0009594 |
| <b>Sqstm1</b>  | 9638.73   | 7583.31  | 12105.24  | 1.60 | 0.0017006 |
| <b>Mypn</b>    | 6090.91   | 4795.22  | 7645.74   | 1.59 | 0.0001779 |
| <b>Pknox2</b>  | 331.89    | 261.49   | 416.36    | 1.59 | 0.0087304 |
| <b>Yipf3</b>   | 789.92    | 622.47   | 990.86    | 1.59 | 0.0026562 |
| <b>Vwf</b>     | 1129.21   | 890.26   | 1415.96   | 1.59 | 0.0093185 |
| <b>Mroh1</b>   | 1380.91   | 1089.00  | 1731.19   | 1.59 | 0.0009811 |
| <b>Scap</b>    | 1572.86   | 1240.39  | 1971.82   | 1.59 | 0.0004971 |
| <b>Jade2</b>   | 374.21    | 295.14   | 469.09    | 1.59 | 0.0073072 |
| <b>Gys1</b>    | 12822.21  | 10115.93 | 16069.75  | 1.59 | 0.0051567 |
| <b>Nfix</b>    | 929.54    | 733.38   | 1164.92   | 1.59 | 0.0008975 |
| <b>Flad1</b>   | 2093.28   | 1653.50  | 2621.03   | 1.59 | 0.0022096 |
| <b>Top3b</b>   | 720.09    | 568.83   | 901.61    | 1.59 | 0.0033014 |
| <b>Akr7a2</b>  | 1225.02   | 967.79   | 1533.70   | 1.58 | 0.0008068 |
| <b>Pomgnt2</b> | 393.09    | 310.57   | 492.11    | 1.58 | 0.0068349 |
| <b>Gigyf1</b>  | 667.07    | 527.66   | 834.36    | 1.58 | 0.0022703 |
| <b>Vars</b>    | 3229.70   | 2555.07  | 4039.26   | 1.58 | 0.0008068 |
| <b>Man2c1</b>  | 1153.08   | 912.68   | 1441.57   | 1.58 | 0.0008032 |
| <b>Bag6</b>    | 5495.46   | 4349.72  | 6870.35   | 1.58 | 0.0020040 |
| <b>Des</b>     | 111247.96 | 88155.95 | 138958.37 | 1.58 | 0.0021476 |
| <b>Frem2</b>   | 423.34    | 335.49   | 528.77    | 1.58 | 0.0091651 |
| <b>MIlt1</b>   | 1586.15   | 1257.08  | 1981.04   | 1.58 | 0.0009354 |
| <b>Sec24c</b>  | 1355.07   | 1074.38  | 1691.90   | 1.57 | 0.0010263 |
| <b>Ubr4</b>    | 3862.99   | 3063.10  | 4822.85   | 1.57 | 0.0003028 |
| <b>Tpra1</b>   | 664.43    | 527.08   | 829.25    | 1.57 | 0.0022378 |
| <b>Lrp4</b>    | 826.88    | 656.04   | 1031.89   | 1.57 | 0.0028103 |
| <b>Hcfc1</b>   | 2315.94   | 1837.76  | 2889.76   | 1.57 | 0.0011758 |
| <b>Eif2b2</b>  | 552.84    | 438.73   | 689.76    | 1.57 | 0.0043386 |
| <b>Gstm1</b>   | 1355.62   | 1076.02  | 1691.15   | 1.57 | 0.0050386 |
| <b>Pcif1</b>   | 443.82    | 352.33   | 553.61    | 1.57 | 0.0057430 |
| <b>Cpsf3l</b>  | 609.36    | 483.86   | 759.95    | 1.57 | 0.0035975 |
| <b>Bola1</b>   | 365.33    | 290.22   | 455.47    | 1.57 | 0.0095717 |
| <b>Gpt</b>     | 1171.62   | 931.32   | 1459.99   | 1.57 | 0.0014206 |
| <b>Grina</b>   | 2643.64   | 2101.73  | 3293.93   | 1.57 | 0.0051482 |
| <b>Urb1</b>    | 455.55    | 362.30   | 567.45    | 1.57 | 0.0081284 |
| <b>Plcd3</b>   | 510.43    | 405.99   | 635.75    | 1.57 | 0.0082040 |
| <b>Pbxip1</b>  | 3033.09   | 2414.35  | 3775.58   | 1.56 | 0.0019263 |



|                 |         |         |          |      |           |
|-----------------|---------|---------|----------|------|-----------|
| <b>Fgd1</b>     | 718.29  | 571.81  | 894.07   | 1.56 | 0.0068824 |
| <b>Myo1e</b>    | 605.32  | 482.22  | 753.04   | 1.56 | 0.0032401 |
| <b>Creb3l2</b>  | 842.53  | 671.64  | 1047.60  | 1.56 | 0.0040756 |
| <b>Tbx5</b>     | 2138.44 | 1706.38 | 2656.91  | 1.56 | 0.0009399 |
| <b>Myh14</b>    | 5831.09 | 4653.57 | 7244.12  | 1.56 | 0.0005095 |
| <b>Cdh23</b>    | 412.36  | 329.25  | 512.09   | 1.56 | 0.0071687 |
| <b>Phldb1</b>   | 5817.62 | 4645.99 | 7223.57  | 1.55 | 0.0003634 |
| <b>Ptov1</b>    | 1246.63 | 995.68  | 1547.77  | 1.55 | 0.0014337 |
| <b>Hdac5</b>    | 2530.20 | 2021.36 | 3140.80  | 1.55 | 0.0005932 |
| <b>Lzts2</b>    | 863.70  | 690.60  | 1071.43  | 1.55 | 0.0013310 |
| <b>Abca2</b>    | 987.71  | 789.75  | 1225.26  | 1.55 | 0.0039291 |
| <b>Fiz1</b>     | 401.53  | 321.09  | 498.04   | 1.55 | 0.0084483 |
| <b>Mlycd</b>    | 2548.35 | 2038.03 | 3160.72  | 1.55 | 0.0007924 |
| <b>Sec16a</b>   | 1786.51 | 1429.84 | 2214.52  | 1.55 | 0.0009594 |
| <b>Gga3</b>     | 344.44  | 275.71  | 426.92   | 1.55 | 0.0094524 |
| <b>Slc35a4</b>  | 911.28  | 729.54  | 1129.36  | 1.55 | 0.0025200 |
| <b>Crkl</b>     | 639.61  | 512.16  | 792.55   | 1.55 | 0.0043635 |
| <b>Atp13a1</b>  | 405.39  | 324.64  | 502.29   | 1.55 | 0.0099524 |
| <b>Ppt2</b>     | 1110.38 | 889.52  | 1375.41  | 1.55 | 0.0015843 |
| <b>Rogdi</b>    | 1283.84 | 1028.52 | 1590.22  | 1.55 | 0.0013722 |
| <b>Slc25a34</b> | 977.35  | 783.01  | 1210.56  | 1.55 | 0.0018117 |
| <b>Plxnb2</b>   | 1602.58 | 1284.02 | 1984.85  | 1.55 | 0.0018117 |
| <b>Thop1</b>    | 618.53  | 495.65  | 765.99   | 1.55 | 0.0036379 |
| <b>Zfyve1</b>   | 479.20  | 384.02  | 593.40   | 1.55 | 0.0066225 |
| <b>Naga</b>     | 767.99  | 615.74  | 950.68   | 1.54 | 0.0031052 |
| <b>Sec31a</b>   | 1593.40 | 1278.62 | 1971.15  | 1.54 | 0.0070174 |
| <b>Slc3a2</b>   | 2674.54 | 2146.29 | 3308.43  | 1.54 | 0.0007940 |
| <b>Fmc1</b>     | 921.79  | 739.82  | 1140.15  | 1.54 | 0.0057430 |
| <b>Acsf2</b>    | 5598.64 | 4494.29 | 6923.88  | 1.54 | 0.0008283 |
| <b>Ap2a1</b>    | 1190.98 | 956.07  | 1472.88  | 1.54 | 0.0018117 |
| <b>Cst3</b>     | 8630.38 | 6931.00 | 10669.63 | 1.54 | 0.0003265 |
| <b>Fbxo21</b>   | 895.79  | 719.59  | 1107.23  | 1.54 | 0.0025683 |
| <b>Lrrc4b</b>   | 8345.11 | 6709.49 | 10307.85 | 1.54 | 0.0007414 |
| <b>Ilvbl</b>    | 530.91  | 427.04  | 655.56   | 1.54 | 0.0057430 |
| <b>Slc22a17</b> | 571.99  | 460.30  | 706.02   | 1.53 | 0.0095717 |
| <b>Nr1h2</b>    | 1249.14 | 1005.40 | 1541.63  | 1.53 | 0.0014559 |
| <b>Adar</b>     | 1756.34 | 1413.72 | 2167.49  | 1.53 | 0.0011016 |
| <b>Hk1</b>      | 5176.41 | 4167.31 | 6387.33  | 1.53 | 0.0025491 |
| <b>Amotl2</b>   | 4876.29 | 3928.69 | 6013.42  | 1.53 | 0.0007727 |
| <b>Scrib</b>    | 1239.32 | 998.98  | 1527.74  | 1.53 | 0.0038522 |

|                 |          |          |          |      |           |
|-----------------|----------|----------|----------|------|-----------|
| <b>Gata5</b>    | 1949.78  | 1572.32  | 2402.72  | 1.53 | 0.0015684 |
| <b>Kcng2</b>    | 2072.63  | 1671.92  | 2553.49  | 1.53 | 0.0032398 |
| <b>Fam73b</b>   | 1959.75  | 1581.29  | 2413.90  | 1.53 | 0.0011137 |
| <b>Caskin2</b>  | 447.34   | 361.03   | 550.90   | 1.53 | 0.0088766 |
| <b>Nucb1</b>    | 4109.24  | 3316.72  | 5060.27  | 1.53 | 0.0031418 |
| <b>Chst15</b>   | 675.26   | 545.85   | 830.55   | 1.52 | 0.0042979 |
| <b>Baz2a</b>    | 679.88   | 549.65   | 836.16   | 1.52 | 0.0053039 |
| <b>Hyou1</b>    | 6922.56  | 5597.38  | 8512.77  | 1.52 | 0.0007414 |
| <b>Gorasp1</b>  | 1300.85  | 1052.34  | 1599.08  | 1.52 | 0.0037137 |
| <b>Sugp1</b>    | 1573.95  | 1274.11  | 1933.76  | 1.52 | 0.0020040 |
| <b>Ppard</b>    | 1089.01  | 882.10   | 1337.30  | 1.52 | 0.0030463 |
| <b>Zfp710</b>   | 756.33   | 613.02   | 928.31   | 1.51 | 0.0059849 |
| <b>Tmem109</b>  | 2616.39  | 2120.96  | 3210.89  | 1.51 | 0.0058549 |
| <b>Nr1d1</b>    | 2704.03  | 2192.37  | 3318.02  | 1.51 | 0.0070362 |
| <b>Snx33</b>    | 914.11   | 741.19   | 1121.62  | 1.51 | 0.0050386 |
| <b>Abcd1</b>    | 963.50   | 781.36   | 1182.07  | 1.51 | 0.0035975 |
| <b>Ccdc97</b>   | 1019.65  | 827.02   | 1250.82  | 1.51 | 0.0056711 |
| <b>Tpcn1</b>    | 1154.18  | 936.20   | 1415.77  | 1.51 | 0.0073866 |
| <b>Sf1</b>      | 947.14   | 768.39   | 1161.64  | 1.51 | 0.0046362 |
| <b>Slc4a3</b>   | 7205.55  | 5847.67  | 8835.01  | 1.51 | 0.0008744 |
| <b>Tln1</b>     | 6005.23  | 4873.86  | 7362.87  | 1.51 | 0.0083205 |
| <b>Emc10</b>    | 1213.27  | 984.78   | 1487.47  | 1.51 | 0.0053570 |
| <b>Ift172</b>   | 1099.06  | 892.21   | 1347.26  | 1.51 | 0.0037137 |
| <b>Tns1</b>     | 19321.76 | 15689.84 | 23680.06 | 1.51 | 0.0008068 |
| <b>Ighmbp2</b>  | 621.59   | 505.15   | 761.32   | 1.51 | 0.0063802 |
| <b>Bckdha</b>   | 6127.62  | 4980.12  | 7504.61  | 1.51 | 0.0017378 |
| <b>Ubc</b>      | 7189.99  | 5844.12  | 8805.02  | 1.51 | 0.0008283 |
| <b>Herpud1</b>  | 8174.19  | 6645.71  | 10008.36 | 1.51 | 0.0009257 |
| <b>Tcof1</b>    | 815.20   | 663.19   | 997.60   | 1.50 | 0.0047814 |
| <b>Tmem184b</b> | 1057.43  | 860.40   | 1293.86  | 1.50 | 0.0048862 |
| <b>Plekhm2</b>  | 4795.49  | 3901.98  | 5867.70  | 1.50 | 0.0014533 |
| <b>Rab11b</b>   | 2415.57  | 1965.79  | 2955.32  | 1.50 | 0.0017166 |
| <b>Zer1</b>     | 1575.62  | 1282.79  | 1927.01  | 1.50 | 0.0025683 |
| <b>Tubgcp6</b>  | 561.39   | 457.15   | 686.48   | 1.50 | 0.0064216 |
| <b>Ptms</b>     | 3182.38  | 2591.82  | 3891.05  | 1.50 | 0.0051546 |
| <b>Sars2</b>    | 835.61   | 680.86   | 1021.30  | 1.50 | 0.0070423 |

**Supplemental Table 4: DESeq Results of Genes Enriched in Male Myocytes Analyzed with IPA**

| id                | baseMean | baseMean Male | baseMean Female | Fold Change | padj      |
|-------------------|----------|---------------|-----------------|-------------|-----------|
| <b>Ddx3</b>       | 1276.95  | 2340.91       | 0.21            | 0.0001      | 1.85E-118 |
| <b>Eif2s3y</b>    | 1208.58  | 2215.25       | 0.58            | 0.0003      | 5.12E-111 |
| <b>Chrng</b>      | 6.65     | 12.05         | 0.18            | 0.0150      | 0.003963  |
| <b>Sgol2</b>      | 24.20    | 41.20         | 3.80            | 0.0923      | 0.005511  |
| <b>Cep55</b>      | 17.84    | 29.69         | 3.61            | 0.1216      | 0.001141  |
| <b>Casc5</b>      | 48.33    | 80.20         | 10.09           | 0.1258      | 0.000001  |
| <b>Aspa</b>       | 23.11    | 38.19         | 5.01            | 0.1313      | 0.000497  |
| <b>Lpar4</b>      | 14.37    | 23.67         | 3.21            | 0.1357      | 0.004642  |
| <b>Prc1</b>       | 93.03    | 150.74        | 23.78           | 0.1577      | 0.003308  |
| <b>Pbk</b>        | 23.42    | 37.80         | 6.15            | 0.1628      | 0.009011  |
| <b>Ndc80</b>      | 17.15    | 27.59         | 4.62            | 0.1673      | 0.006821  |
| <b>Dbf4</b>       | 19.23    | 30.76         | 5.39            | 0.1753      | 0.005671  |
| <b>Kif11</b>      | 48.82    | 77.11         | 14.88           | 0.1929      | 0.002660  |
| <b>Rrm2</b>       | 48.42    | 74.94         | 16.60           | 0.2215      | 0.001738  |
| <b>Htr2a</b>      | 27.06    | 41.70         | 9.49            | 0.2277      | 0.003852  |
| <b>Pde11a</b>     | 26.76    | 41.14         | 9.51            | 0.2312      | 0.003852  |
| <b>Cenpf</b>      | 76.43    | 116.89        | 27.88           | 0.2385      | 0.005050  |
| <b>Top2a</b>      | 119.55   | 181.68        | 44.99           | 0.2476      | 0.000963  |
| <b>Mki67</b>      | 269.59   | 408.55        | 102.83          | 0.2517      | 0.000060  |
| <b>Kif23</b>      | 47.19    | 71.48         | 18.04           | 0.2524      | 0.000684  |
| <b>Phactr3</b>    | 36.85    | 54.19         | 16.03           | 0.2959      | 0.007169  |
| <b>Aspm</b>       | 52.34    | 75.96         | 24.00           | 0.3159      | 0.003017  |
| <b>Irf6</b>       | 113.86   | 165.13        | 52.34           | 0.3170      | 0.000003  |
| <b>Ccnb2</b>      | 46.79    | 67.81         | 21.56           | 0.3180      | 0.005855  |
| <b>Pycard</b>     | 81.66    | 118.01        | 38.03           | 0.3223      | 0.006607  |
| <b>Tfrc</b>       | 5804.64  | 8298.02       | 2812.58         | 0.3389      | 0.000000  |
| <b>Mest</b>       | 83.51    | 118.84        | 41.11           | 0.3459      | 0.000187  |
| <b>Col3a1</b>     | 7628.03  | 10722.45      | 3914.72         | 0.3651      | 0.000012  |
| <b>Csrp2</b>      | 143.42   | 200.65        | 74.74           | 0.3725      | 0.005242  |
| <b>Cep290</b>     | 253.26   | 353.34        | 133.17          | 0.3769      | 0.000833  |
| <b>Fmr1</b>       | 410.56   | 572.46        | 216.28          | 0.3778      | 0.002100  |
| <b>Csgalnact1</b> | 81.70    | 112.86        | 44.32           | 0.3927      | 0.001102  |
| <b>Emp1</b>       | 1512.69  | 2089.38       | 820.66          | 0.3928      | 0.000024  |
| <b>Arhgap11a</b>  | 83.37    | 115.11        | 45.29           | 0.3935      | 0.005039  |

|                   |         |         |        |        |          |
|-------------------|---------|---------|--------|--------|----------|
| <b>Il1b</b>       | 67.34   | 92.86   | 36.71  | 0.3954 | 0.003544 |
| <b>Ccp110</b>     | 98.95   | 135.61  | 54.95  | 0.4052 | 0.001141 |
| <b>Loxl2</b>      | 167.88  | 230.02  | 93.30  | 0.4056 | 0.000029 |
| <b>Postn</b>      | 78.71   | 107.76  | 43.84  | 0.4068 | 0.002879 |
| <b>Dgkb</b>       | 912.53  | 1249.09 | 508.67 | 0.4072 | 0.003126 |
| <b>Tspan2</b>     | 777.11  | 1062.69 | 434.40 | 0.4088 | 0.004174 |
| <b>Casp3</b>      | 146.92  | 199.76  | 83.51  | 0.4181 | 0.000152 |
| <b>Pik3c2a</b>    | 1054.64 | 1426.13 | 608.85 | 0.4269 | 0.004249 |
| <b>Fap</b>        | 70.33   | 94.94   | 40.80  | 0.4298 | 0.006223 |
| <b>Mrc1</b>       | 145.06  | 194.33  | 85.92  | 0.4422 | 0.005776 |
| <b>C1qtnf6</b>    | 71.50   | 95.72   | 42.42  | 0.4432 | 0.008128 |
| <b>Klhl4</b>      | 114.04  | 152.43  | 67.97  | 0.4459 | 0.002015 |
| <b>Tmed5</b>      | 724.36  | 965.01  | 435.59 | 0.4514 | 0.006238 |
| <b>Kras</b>       | 213.58  | 284.47  | 128.52 | 0.4518 | 0.001098 |
| <b>Vcan</b>       | 268.49  | 357.15  | 162.10 | 0.4539 | 0.001052 |
| <b>Ptbp3</b>      | 238.85  | 317.67  | 144.26 | 0.4541 | 0.003126 |
| <b>Pvrl3</b>      | 185.62  | 246.75  | 112.26 | 0.4550 | 0.000232 |
| <b>Arl5b</b>      | 408.62  | 541.79  | 248.82 | 0.4592 | 0.007025 |
| <b>Tlk1</b>       | 171.20  | 226.88  | 104.40 | 0.4601 | 0.000593 |
| <b>Abrac1</b>     | 137.96  | 182.45  | 84.57  | 0.4635 | 0.001421 |
| <b>Sema3d</b>     | 186.67  | 246.88  | 114.43 | 0.4635 | 0.001812 |
| <b>Gnai3</b>      | 1163.55 | 1538.77 | 713.29 | 0.4635 | 0.001694 |
| <b>Cav2</b>       | 821.77  | 1086.76 | 503.78 | 0.4636 | 0.002361 |
| <b>Casp8ap2</b>   | 504.93  | 667.58  | 309.76 | 0.4640 | 0.005145 |
| <b>Sh3bgr1</b>    | 662.38  | 874.21  | 408.17 | 0.4669 | 0.000000 |
| <b>Cd83</b>       | 148.18  | 195.31  | 91.63  | 0.4691 | 0.004252 |
| <b>RGD1305110</b> | 685.77  | 903.84  | 424.08 | 0.4692 | 0.003310 |
| <b>Nrep</b>       | 136.82  | 180.32  | 84.61  | 0.4693 | 0.001389 |
| <b>Rab8b</b>      | 245.89  | 323.22  | 153.11 | 0.4737 | 0.000885 |
| <b>Dock11</b>     | 199.18  | 260.89  | 125.13 | 0.4796 | 0.001436 |
| <b>Slc35a3</b>    | 191.25  | 250.31  | 120.39 | 0.4810 | 0.000636 |
| <b>Zdhhc21</b>    | 215.55  | 281.91  | 135.92 | 0.4821 | 0.000885 |
| <b>Calcrl</b>     | 460.58  | 599.64  | 293.71 | 0.4898 | 0.001009 |
| <b>Rnf152</b>     | 202.39  | 263.16  | 129.47 | 0.4920 | 0.005525 |
| <b>Rcn1</b>       | 1159.90 | 1503.97 | 747.02 | 0.4967 | 0.000000 |
| <b>LOC367515</b>  | 302.53  | 391.77  | 195.45 | 0.4989 | 0.009049 |
| <b>Prrg1</b>      | 174.71  | 225.79  | 113.41 | 0.5023 | 0.001809 |
| <b>Bub1</b>       | 125.00  | 161.08  | 81.70  | 0.5072 | 0.004627 |
| <b>Prcp</b>       | 317.17  | 408.58  | 207.48 | 0.5078 | 0.000437 |
| <b>Smc2</b>       | 311.37  | 400.52  | 204.40 | 0.5103 | 0.004627 |

|                   |          |          |          |        |          |
|-------------------|----------|----------|----------|--------|----------|
| <b>Trim37</b>     | 227.78   | 292.79   | 149.76   | 0.5115 | 0.000741 |
| <b>Kif5b</b>      | 18334.26 | 23556.34 | 12067.77 | 0.5123 | 0.007645 |
| <b>Cd302</b>      | 118.32   | 151.95   | 77.95    | 0.5130 | 0.009165 |
| <b>Ccng1</b>      | 37672.02 | 48379.01 | 24823.63 | 0.5131 | 0.006581 |
| <b>Idi1</b>       | 299.00   | 383.79   | 197.26   | 0.5140 | 0.008826 |
| <b>Zfp367</b>     | 238.99   | 306.40   | 158.11   | 0.5160 | 0.004909 |
| <b>Gnai1</b>      | 116.37   | 149.13   | 77.06    | 0.5167 | 0.008826 |
| <b>Alg13</b>      | 161.37   | 206.46   | 107.27   | 0.5196 | 0.003310 |
| <b>Eif2ak2</b>    | 1224.71  | 1565.79  | 815.40   | 0.5208 | 0.000041 |
| <b>Nin</b>        | 374.53   | 478.69   | 249.55   | 0.5213 | 0.000775 |
| <b>RGD1308706</b> | 1076.32  | 1374.44  | 718.58   | 0.5228 | 0.003463 |
| <b>Vps36</b>      | 564.58   | 720.63   | 377.33   | 0.5236 | 0.004216 |
| <b>Pten</b>       | 1551.23  | 1978.58  | 1038.40  | 0.5248 | 0.005010 |
| <b>Mum1i1</b>     | 237.07   | 302.38   | 158.70   | 0.5248 | 0.005500 |
| <b>Dynlt3</b>     | 1363.19  | 1736.74  | 914.93   | 0.5268 | 0.006331 |
| <b>Rbbp8</b>      | 164.65   | 209.74   | 110.54   | 0.5270 | 0.004038 |
| <b>Mtf2</b>       | 184.61   | 235.04   | 124.08   | 0.5279 | 0.007950 |
| <b>Ap3s1</b>      | 252.51   | 321.19   | 170.09   | 0.5296 | 0.000885 |
| <b>Rnd3</b>       | 3365.77  | 4275.62  | 2273.96  | 0.5318 | 0.006835 |
| <b>S100a10</b>    | 555.79   | 705.73   | 375.86   | 0.5326 | 0.007867 |
| <b>Hopx</b>       | 1467.02  | 1862.78  | 992.11   | 0.5326 | 0.002361 |
| <b>Col1a1</b>     | 557.56   | 707.97   | 377.07   | 0.5326 | 0.007623 |
| <b>Sgce</b>       | 363.85   | 461.81   | 246.29   | 0.5333 | 0.000262 |
| <b>Tmod3</b>      | 935.95   | 1186.99  | 634.70   | 0.5347 | 0.000491 |
| <b>Pank3</b>      | 862.47   | 1092.49  | 586.44   | 0.5368 | 0.002793 |
| <b>Rps6kb1</b>    | 1385.55  | 1755.00  | 942.21   | 0.5369 | 0.008128 |
| <b>Cyp2j4</b>     | 382.27   | 484.08   | 260.10   | 0.5373 | 0.004951 |
| <b>Rasa1</b>      | 2138.54  | 2707.34  | 1455.99  | 0.5378 | 0.004781 |
| <b>Csde1</b>      | 31315.86 | 39635.10 | 21332.77 | 0.5382 | 0.009572 |
| <b>Gbp2</b>       | 681.27   | 862.16   | 464.19   | 0.5384 | 0.003033 |
| <b>Mospd2</b>     | 184.52   | 233.36   | 125.91   | 0.5396 | 0.004252 |
| <b>Col5a2</b>     | 557.91   | 704.99   | 381.40   | 0.5410 | 0.008114 |
| <b>Tmtc4</b>      | 477.64   | 602.99   | 327.21   | 0.5427 | 0.000807 |
| <b>Zhx1</b>       | 914.21   | 1153.55  | 626.99   | 0.5435 | 0.009268 |
| <b>Pign</b>       | 276.67   | 348.70   | 190.22   | 0.5455 | 0.001094 |
| <b>Zdhhc17</b>    | 416.06   | 524.08   | 286.44   | 0.5466 | 0.001885 |
| <b>Htatsf1</b>    | 957.98   | 1205.91  | 660.46   | 0.5477 | 0.005869 |
| <b>Jak2</b>       | 669.18   | 841.82   | 462.02   | 0.5488 | 0.004636 |
| <b>Larp1b</b>     | 5415.04  | 6809.79  | 3741.35  | 0.5494 | 0.004252 |
| <b>Cmpk1</b>      | 1116.75  | 1402.24  | 774.17   | 0.5521 | 0.002870 |

|                        |            |           |           |        |          |
|------------------------|------------|-----------|-----------|--------|----------|
| <b>Arrdc3</b>          | 898.72     | 1127.98   | 623.61    | 0.5529 | 0.002068 |
| <b>Usp12</b>           | 426.26     | 534.43    | 296.45    | 0.5547 | 0.008448 |
| <b>Memo1</b>           | 860.64     | 1078.41   | 599.30    | 0.5557 | 0.005511 |
| <b>Tlr3</b>            | 174.33     | 218.19    | 121.70    | 0.5578 | 0.006052 |
| <b>Bhlhb9</b>          | 171.97     | 215.19    | 120.11    | 0.5582 | 0.005511 |
| <b>Llph</b>            | 473.49     | 591.59    | 331.78    | 0.5608 | 0.002667 |
| <b>Kctd18</b>          | 199.93     | 249.64    | 140.28    | 0.5619 | 0.006226 |
| <b>Cyb5r4</b>          | 297.87     | 371.80    | 209.16    | 0.5626 | 0.005357 |
| <b>Rb1cc1</b>          | 2309.59    | 2882.18   | 1622.49   | 0.5629 | 0.007836 |
| <b>Nampt</b>           | 9356.74    | 11669.60  | 6581.32   | 0.5640 | 0.000746 |
| <b>Myef2</b>           | 511.71     | 638.16    | 359.97    | 0.5641 | 0.004750 |
| <b>Pdcd4</b>           | 480.64     | 599.19    | 338.38    | 0.5647 | 0.000469 |
| <b>Cdv3</b>            | 2183.21    | 2721.01   | 1537.84   | 0.5652 | 0.008818 |
| <b>Dstn</b>            | 4937.81    | 6144.46   | 3489.83   | 0.5680 | 0.000002 |
| <b>Eif1a</b>           | 936.33     | 1164.38   | 662.66    | 0.5691 | 0.005331 |
| <b>Tceal8</b>          | 1562.42    | 1942.44   | 1106.38   | 0.5696 | 0.003597 |
| <b>Emc2</b>            | 3097.47    | 3847.05   | 2197.98   | 0.5713 | 0.008826 |
| <b>Hmgb2</b>           | 488.12     | 605.84    | 346.87    | 0.5725 | 0.001554 |
| <b>Bmi1</b>            | 1167.21    | 1447.51   | 830.86    | 0.5740 | 0.007309 |
| <b>Rab30</b>           | 277.27     | 343.85    | 197.38    | 0.5740 | 0.002614 |
| <b>Pik3r3</b>          | 488.50     | 605.77    | 347.78    | 0.5741 | 0.000437 |
| <b>Hmgn3</b>           | 980.53     | 1215.36   | 698.72    | 0.5749 | 0.000875 |
| <b>Prkx</b>            | 277.96     | 344.36    | 198.28    | 0.5758 | 0.002877 |
| <b>Apaf1</b>           | 272.17     | 337.16    | 194.17    | 0.5759 | 0.003105 |
| <b>Ccz1b</b>           | 724.75     | 897.73    | 517.18    | 0.5761 | 0.001663 |
| <b>Rala</b>            | 749.52     | 927.62    | 535.80    | 0.5776 | 0.001436 |
| <b>Chm</b>             | 819.16     | 1013.48   | 585.97    | 0.5782 | 0.007309 |
| <b>Myo9a</b>           | 2269.61    | 2806.68   | 1625.13   | 0.5790 | 0.006715 |
| <b>Ankrd13c</b>        | 565.01     | 698.66    | 404.63    | 0.5791 | 0.000579 |
| <b>Tpk1</b>            | 234.45     | 289.54    | 168.35    | 0.5814 | 0.004886 |
| <b>Kpna5</b>           | 356.29     | 439.93    | 255.93    | 0.5817 | 0.002709 |
| <b>Mif1</b>            | 2722.65    | 3361.26   | 1956.33   | 0.5820 | 0.000018 |
| <b>Nes</b>             | 722.07     | 891.42    | 518.84    | 0.5820 | 0.000310 |
| <b>Ccnd2</b>           | 8591.39    | 10605.13  | 6174.91   | 0.5823 | 0.003852 |
| <b>Gadd45a</b>         | 3418.42    | 4219.52   | 2457.09   | 0.5823 | 0.008144 |
| <b>Baz1a</b>           | 408.32     | 503.73    | 293.83    | 0.5833 | 0.006953 |
| <b>Anxa10</b>          | 495.53     | 611.22    | 356.70    | 0.5836 | 0.000874 |
| <b>Gabpa</b>           | 1410.38    | 1739.42   | 1015.53   | 0.5838 | 0.004962 |
| <b>ENSRNOG00000030</b> | 1140346.90 | 1405569.4 | 822079.91 | 0.5849 | 0.004252 |
| <b>371</b>             |            | 0         |           |        |          |

|                 |         |         |         |        |          |
|-----------------|---------|---------|---------|--------|----------|
| <b>Pds5a</b>    | 1588.98 | 1958.53 | 1145.51 | 0.5849 | 0.001717 |
| <b>Azin1</b>    | 3718.59 | 4583.32 | 2680.92 | 0.5849 | 0.009463 |
| <b>Serp1</b>    | 607.90  | 749.20  | 438.34  | 0.5851 | 0.000807 |
| <b>Rap1b</b>    | 372.76  | 459.25  | 268.97  | 0.5857 | 0.003338 |
| <b>Rmdn1</b>    | 2890.38 | 3557.56 | 2089.76 | 0.5874 | 0.005437 |
| <b>Cops2</b>    | 2290.34 | 2816.77 | 1658.62 | 0.5888 | 0.003394 |
| <b>Pigy</b>     | 2383.45 | 2928.69 | 1729.17 | 0.5904 | 0.000768 |
| <b>Ap1s2</b>    | 1124.63 | 1381.46 | 816.43  | 0.5910 | 0.007179 |
| <b>Pon2</b>     | 477.68  | 586.67  | 346.90  | 0.5913 | 0.001141 |
| <b>Homer2</b>   | 649.06  | 796.74  | 471.84  | 0.5922 | 0.002536 |
| <b>Pdcd10</b>   | 539.47  | 661.64  | 392.87  | 0.5938 | 0.001207 |
| <b>Fbn1</b>     | 469.30  | 575.50  | 341.87  | 0.5940 | 0.009463 |
| <b>Tmtc3</b>    | 1281.78 | 1571.21 | 934.46  | 0.5947 | 0.004980 |
| <b>Cggbp1</b>   | 1211.39 | 1484.34 | 883.84  | 0.5954 | 0.007078 |
| <b>Reep3</b>    | 229.47  | 281.10  | 167.51  | 0.5959 | 0.009394 |
| <b>Magi3</b>    | 3687.10 | 4515.77 | 2692.69 | 0.5963 | 0.000712 |
| <b>Nr3c1</b>    | 4570.62 | 5595.33 | 3340.97 | 0.5971 | 0.006203 |
| <b>Ptpla</b>    | 1300.07 | 1591.35 | 950.54  | 0.5973 | 0.000593 |
| <b>Gng12</b>    | 273.44  | 334.60  | 200.04  | 0.5979 | 0.004676 |
| <b>Rbm25</b>    | 3283.07 | 4013.87 | 2406.12 | 0.5995 | 0.008826 |
| <b>Syap1</b>    | 638.31  | 780.01  | 468.26  | 0.6003 | 0.002350 |
| <b>Ergic2</b>   | 2611.04 | 3190.28 | 1915.96 | 0.6006 | 0.006203 |
| <b>Arpc5l</b>   | 1335.92 | 1632.07 | 980.55  | 0.6008 | 0.007645 |
| <b>Ireb2</b>    | 543.93  | 664.34  | 399.44  | 0.6012 | 0.006581 |
| <b>Strn3</b>    | 5154.34 | 6292.21 | 3788.89 | 0.6022 | 0.007441 |
| <b>Efnb2</b>    | 296.90  | 362.43  | 218.27  | 0.6022 | 0.005985 |
| <b>Rab6a</b>    | 2283.26 | 2786.56 | 1679.30 | 0.6026 | 0.007169 |
| <b>Usp1</b>     | 943.49  | 1151.40 | 694.00  | 0.6027 | 0.005386 |
| <b>Apool</b>    | 1687.02 | 2052.84 | 1248.04 | 0.6080 | 0.004733 |
| <b>Vps4b</b>    | 1226.24 | 1491.97 | 907.37  | 0.6082 | 0.007025 |
| <b>Otud6b</b>   | 1712.49 | 2083.18 | 1267.65 | 0.6085 | 0.009368 |
| <b>Lnpep</b>    | 5706.33 | 6940.35 | 4225.49 | 0.6088 | 0.002298 |
| <b>Mob1a</b>    | 1278.47 | 1554.86 | 946.81  | 0.6089 | 0.000436 |
| <b>Slk</b>      | 3902.98 | 4746.47 | 2890.80 | 0.6090 | 0.006629 |
| <b>Usp46</b>    | 781.73  | 950.23  | 579.53  | 0.6099 | 0.002520 |
| <b>Pros1</b>    | 336.44  | 408.88  | 249.51  | 0.6102 | 0.004339 |
| <b>Ppp1r14c</b> | 3827.51 | 4651.09 | 2839.22 | 0.6104 | 0.005304 |
| <b>Uba3</b>     | 3016.64 | 3665.73 | 2237.73 | 0.6104 | 0.007179 |
| <b>Atg4al1</b>  | 567.41  | 689.17  | 421.29  | 0.6113 | 0.001568 |
| <b>Rab21</b>    | 1695.57 | 2059.16 | 1259.25 | 0.6115 | 0.009452 |

|                 |          |          |          |        |          |
|-----------------|----------|----------|----------|--------|----------|
| <b>Tgfr1</b>    | 653.51   | 793.43   | 485.59   | 0.6120 | 0.005039 |
| <b>Rnf2</b>     | 1609.47  | 1953.34  | 1196.82  | 0.6127 | 0.001437 |
| <b>Ggct</b>     | 332.42   | 403.06   | 247.66   | 0.6144 | 0.006203 |
| <b>Sept2</b>    | 5611.23  | 6802.92  | 4181.20  | 0.6146 | 0.000084 |
| <b>Nasp</b>     | 715.87   | 867.87   | 533.47   | 0.6147 | 0.001003 |
| <b>March7</b>   | 2429.51  | 2943.89  | 1812.26  | 0.6156 | 0.001701 |
| <b>Phospho2</b> | 527.04   | 638.44   | 393.35   | 0.6161 | 0.006874 |
| <b>Eapp</b>     | 630.19   | 763.33   | 470.42   | 0.6163 | 0.004886 |
| <b>Usp32</b>    | 1839.83  | 2227.33  | 1374.83  | 0.6173 | 0.003354 |
| <b>Pafah1b1</b> | 4823.21  | 5832.23  | 3612.39  | 0.6194 | 0.005922 |
| <b>Tpt1</b>     | 35394.86 | 42770.09 | 26544.58 | 0.6206 | 0.002656 |
| <b>Tomm20</b>   | 3536.13  | 4271.34  | 2653.88  | 0.6213 | 0.002176 |
| <b>Armcx3</b>   | 3821.08  | 4615.39  | 2867.91  | 0.6214 | 0.000356 |
| <b>Birc2</b>    | 943.20   | 1139.05  | 708.17   | 0.6217 | 0.007309 |
| <b>Dnaja1</b>   | 4316.92  | 5213.11  | 3241.49  | 0.6218 | 0.000121 |
| <b>Ogfr1</b>    | 513.69   | 619.78   | 386.38   | 0.6234 | 0.009463 |
| <b>Gpatch11</b> | 327.85   | 395.49   | 246.69   | 0.6238 | 0.007025 |
| <b>Sept7</b>    | 9081.32  | 10949.15 | 6839.92  | 0.6247 | 0.006874 |
| <b>Tulp4</b>    | 329.89   | 397.64   | 248.59   | 0.6252 | 0.009452 |
| <b>Phf10</b>    | 771.48   | 929.87   | 581.40   | 0.6253 | 0.002358 |
| <b>Capza1</b>   | 1053.92  | 1269.87  | 794.78   | 0.6259 | 0.000874 |
| <b>Kctd9</b>    | 347.65   | 418.74   | 262.33   | 0.6265 | 0.006992 |
| <b>Tdg</b>      | 318.93   | 384.15   | 240.67   | 0.6265 | 0.009290 |
| <b>Mib1</b>     | 457.35   | 550.50   | 345.58   | 0.6278 | 0.004272 |
| <b>Cycs</b>     | 50233.19 | 60457.55 | 37963.96 | 0.6279 | 0.003145 |
| <b>Plekha3</b>  | 802.45   | 965.66   | 606.60   | 0.6282 | 0.008448 |
| <b>Sh3glb1</b>  | 12696.71 | 15266.00 | 9613.56  | 0.6297 | 0.005985 |
| <b>Evl</b>      | 316.08   | 379.96   | 239.42   | 0.6301 | 0.007388 |
| <b>Klf6</b>     | 5347.22  | 6427.77  | 4050.57  | 0.6302 | 0.001913 |
| <b>Arcp2</b>    | 5093.31  | 6118.42  | 3863.17  | 0.6314 | 0.001568 |
| <b>Mrpl18</b>   | 770.72   | 925.73   | 584.71   | 0.6316 | 0.004252 |
| <b>Tmem126a</b> | 2372.92  | 2849.59  | 1800.92  | 0.6320 | 0.007309 |
| <b>Acap2</b>    | 447.71   | 537.64   | 339.80   | 0.6320 | 0.005743 |
| <b>Mex3c</b>    | 651.82   | 782.45   | 495.07   | 0.6327 | 0.005985 |
| <b>Nab1</b>     | 1299.86  | 1560.05  | 987.63   | 0.6331 | 0.003495 |
| <b>Ttc39b</b>   | 725.98   | 871.28   | 551.63   | 0.6331 | 0.002793 |
| <b>Tarsl2</b>   | 1327.74  | 1593.32  | 1009.05  | 0.6333 | 0.004840 |
| <b>Ppat</b>     | 3131.28  | 3757.32  | 2380.04  | 0.6334 | 0.003376 |
| <b>Usmg5</b>    | 32330.06 | 38783.42 | 24586.04 | 0.6339 | 0.004529 |
| <b>Csnk1g3</b>  | 999.02   | 1198.14  | 760.07   | 0.6344 | 0.009003 |



|                           |            |            |            |        |          |
|---------------------------|------------|------------|------------|--------|----------|
| <b>Mtx2</b>               | 882.99     | 1058.42    | 672.47     | 0.6354 | 0.004498 |
| <b>Msantd3</b>            | 441.93     | 529.51     | 336.83     | 0.6361 | 0.007867 |
| <b>Setd2</b>              | 1633.94    | 1956.74    | 1246.58    | 0.6371 | 0.009135 |
| <b>Mapk6</b>              | 1904.14    | 2279.03    | 1454.28    | 0.6381 | 0.002614 |
| <b>Capza2</b>             | 3346.74    | 4004.74    | 2557.15    | 0.6385 | 0.007881 |
| <b>Akirin1</b>            | 699.19     | 836.64     | 534.24     | 0.6386 | 0.003126 |
| <b>Mfap1a</b>             | 2586.07    | 3094.25    | 1976.27    | 0.6387 | 0.000437 |
| <b>Smek1</b>              | 1111.62    | 1330.05    | 849.50     | 0.6387 | 0.006835 |
| <b>MGC95208</b>           | 589.60     | 705.42     | 450.62     | 0.6388 | 0.005304 |
| <b>Dnajc3</b>             | 1597.93    | 1911.60    | 1221.53    | 0.6390 | 0.001204 |
| <b>Chd1</b>               | 1508.98    | 1805.16    | 1153.56    | 0.6390 | 0.005760 |
| <b>Ugp2</b>               | 16427.31   | 19651.49   | 12558.29   | 0.6391 | 0.003476 |
| <b>Guf1</b>               | 2782.59    | 3328.03    | 2128.06    | 0.6394 | 0.008149 |
| <b>Cfl2</b>               | 7461.98    | 8924.37    | 5707.11    | 0.6395 | 0.006882 |
| <b>Ccdc85a</b>            | 760.23     | 909.14     | 581.54     | 0.6397 | 0.002568 |
| <b>Rbm7</b>               | 688.88     | 823.41     | 527.45     | 0.6406 | 0.003308 |
| <b>Did</b>                | 13930.62   | 16649.65   | 10667.79   | 0.6407 | 0.002327 |
| <b>Chmp3</b>              | 3546.91    | 4236.77    | 2719.08    | 0.6418 | 0.003380 |
| <b>Atf1</b>               | 1550.17    | 1851.64    | 1188.40    | 0.6418 | 0.005855 |
| <b>Xpr1</b>               | 445.46     | 532.06     | 341.54     | 0.6419 | 0.009185 |
| <b>Picalm</b>             | 3090.37    | 3689.40    | 2371.53    | 0.6428 | 0.003230 |
| <b>Gtf2h1</b>             | 827.10     | 987.22     | 634.97     | 0.6432 | 0.002361 |
| <b>ENSRNOG00000030700</b> | 1344362.65 | 1604051.86 | 1032735.60 | 0.6438 | 0.006331 |
| <b>Hmgb1</b>              | 2514.99    | 3000.58    | 1932.28    | 0.6440 | 0.005304 |
| <b>Slc12a2</b>            | 738.06     | 880.03     | 567.69     | 0.6451 | 0.003720 |
| <b>Usp25</b>              | 2948.27    | 3512.91    | 2270.70    | 0.6464 | 0.008128 |
| <b>Canx</b>               | 15085.27   | 17966.38   | 11627.93   | 0.6472 | 0.002667 |
| <b>Psme4</b>              | 9827.56    | 11693.63   | 7588.26    | 0.6489 | 0.001372 |
| <b>March5</b>             | 936.03     | 1112.77    | 723.95     | 0.6506 | 0.007795 |
| <b>Them4</b>              | 959.80     | 1140.45    | 743.02     | 0.6515 | 0.003238 |
| <b>Btbd1</b>              | 12385.13   | 14714.61   | 9589.76    | 0.6517 | 0.004878 |
| <b>Minos1</b>             | 6021.63    | 7153.54    | 4663.34    | 0.6519 | 0.001436 |
| <b>Snap23</b>             | 1042.02    | 1237.87    | 807.01     | 0.6519 | 0.007645 |
| <b>Atg3</b>               | 1181.98    | 1404.01    | 915.54     | 0.6521 | 0.004745 |
| <b>Plaa</b>               | 3334.30    | 3958.89    | 2584.80    | 0.6529 | 0.000807 |
| <b>Crk</b>                | 3143.46    | 3731.30    | 2438.04    | 0.6534 | 0.001115 |
| <b>Frg1</b>               | 1131.07    | 1342.52    | 877.34     | 0.6535 | 0.003714 |
| <b>Cox6c</b>              | 51012.50   | 60540.28   | 39579.16   | 0.6538 | 0.007179 |
| <b>Mtmr6</b>              | 2155.91    | 2558.16    | 1673.20    | 0.6541 | 0.005869 |

|                   |          |          |          |        |          |
|-------------------|----------|----------|----------|--------|----------|
| <b>Eif4e3</b>     | 870.69   | 1032.95  | 675.97   | 0.6544 | 0.003929 |
| <b>RGD1308147</b> | 735.15   | 871.91   | 571.03   | 0.6549 | 0.005357 |
| <b>Lims1</b>      | 3303.04  | 3914.99  | 2568.71  | 0.6561 | 0.008459 |
| <b>Pdha1</b>      | 44453.77 | 52675.18 | 34588.08 | 0.6566 | 0.004781 |
| <b>Ccdc43</b>     | 1215.94  | 1440.74  | 946.18   | 0.6567 | 0.004953 |
| <b>LOC499602</b>  | 1467.47  | 1738.60  | 1142.12  | 0.6569 | 0.001736 |
| <b>Gkap1</b>      | 1007.72  | 1193.72  | 784.52   | 0.6572 | 0.003315 |
| <b>Rab1a</b>      | 3053.06  | 3615.37  | 2378.29  | 0.6578 | 0.001926 |
| <b>Rsrc2</b>      | 3140.82  | 3718.56  | 2447.54  | 0.6582 | 0.006238 |
| <b>Wdr26</b>      | 4153.12  | 4915.21  | 3238.62  | 0.6589 | 0.005304 |
| <b>Metap2</b>     | 3874.19  | 4584.74  | 3021.53  | 0.6590 | 0.003929 |
| <b>Mrpl32</b>     | 1472.39  | 1742.33  | 1148.46  | 0.6591 | 0.002252 |
| <b>Ppp2r3a</b>    | 8039.47  | 9505.41  | 6280.33  | 0.6607 | 0.001331 |
| <b>Stmn1</b>      | 1279.60  | 1512.82  | 999.73   | 0.6608 | 0.002513 |
| <b>Cdk14</b>      | 1751.48  | 2070.30  | 1368.90  | 0.6612 | 0.007867 |
| <b>Jtb</b>        | 894.97   | 1057.80  | 699.58   | 0.6614 | 0.004212 |
| <b>Rfc1</b>       | 1540.91  | 1820.77  | 1205.07  | 0.6618 | 0.009368 |
| <b>Csnk1a1</b>    | 3850.13  | 4546.34  | 3014.67  | 0.6631 | 0.002318 |
| <b>Ctps1</b>      | 2980.26  | 3518.67  | 2334.18  | 0.6634 | 0.005304 |
| <b>Bche</b>       | 1011.66  | 1194.23  | 792.57   | 0.6637 | 0.005039 |
| <b>Ralbp1</b>     | 1740.93  | 2054.65  | 1364.46  | 0.6641 | 0.002520 |
| <b>Itgb1</b>      | 8611.57  | 10162.38 | 6750.59  | 0.6643 | 0.000833 |
| <b>Map4k4</b>     | 2801.93  | 3305.91  | 2197.15  | 0.6646 | 0.001554 |
| <b>Ngrn</b>       | 791.76   | 933.66   | 621.47   | 0.6656 | 0.006581 |
| <b>Zfp148</b>     | 1419.97  | 1674.37  | 1114.70  | 0.6657 | 0.003663 |
| <b>Cast</b>       | 3301.57  | 3892.46  | 2592.50  | 0.6660 | 0.005996 |
| <b>Mcts1</b>      | 916.78   | 1080.54  | 720.26   | 0.6666 | 0.006543 |
| <b>Dnm1l</b>      | 5688.03  | 6703.82  | 4469.08  | 0.6666 | 0.000963 |

**Supplemental Table 5: Primer Sequences**

| <b>Primer/Gene Name</b> | <b>Sequence</b>           |
|-------------------------|---------------------------|
| 18S Forward             | gccgctagaggtaaattcttg     |
| 18S Reverse             | cttcgctctggctgctt         |
| Nr4a1 Forward           | tgctctggcctcatcactg       |
| Nr4a1 Reverse           | gacagctagcaatgcgggtc      |
| Tfr3 Forward            | cgattataaaggctatgaggaacc  |
| Tfr3 Reverse            | gttcccacactggacttcg       |
| Col3a1 Forward          | ggcacagcagccaatgtag       |
| Col3a1 Reverse          | cccgagtcgcagacacata       |
| Ccng1 Forward           | actggacagattctgtctaaaatga |
| Ccng1 Reverse           | ggacgttccttcctctca        |
| Ucp2 Forward            | gttctacaccaagggtcaga      |
| Ucp2 Reverse            | gaccttaccacatctgtagggtg   |
| Cox6c Forward           | gcgtctgcgggtcatattg       |
| Cox6c Reverse           | tctgcataagccttcttcttg     |
| Por Forward             | gccgtctgaagagctacgag      |
| Por Reverse             | tggttcagctccgggtg         |

**Supplemental Table 6: Top Ten Activated Canonical Pathways in Genes Enriched in Female Cardiac Myocytes**

| <b>Ingenuity Canonical Pathways</b>                          | <b>-log(p-value)</b> | <b>Ratio</b> | <b>z-score</b> | <b>Molecules</b>                                                    |
|--------------------------------------------------------------|----------------------|--------------|----------------|---------------------------------------------------------------------|
| April Mediated Signaling                                     | 2.79E+00             | 1.05E-01     | 2              | RELA,NFKB2,MAPK12,NFATC1                                            |
| Pancreatic Adenocarcinoma Signaling                          | 2.48E+00             | 5.56E-02     | 2.449          | RELA,PLD3,CYP2E1,NFKB2,MAPK12,JAK3                                  |
| iNOS Signaling                                               | 2.45E+00             | 8.51E-02     | 2              | RELA,NFKB2,MAPK12,JAK3                                              |
| BMP signaling pathway                                        | 2.43E+00             | 6.49E-02     | 2              | NKX2-5,ZNF423,RELA,NFKB2,MAPK12                                     |
| LXR/RXR Activation                                           | 2.12E+00             | 4.69E-02     | 0.447          | C4A/C4B,APOE,RELA,NR1H2,SR EBF1,NFKB2                               |
| Wnt/Ca+ pathway                                              | 2.10E+00             | 6.78E-02     | 2              | PLCD3,RELA,NFKB2,NFATC1                                             |
| Activation of IRF by Cytosolic Pattern Recognition Receptors | 2.00E+00             | 6.35E-02     | 1              | RELA,NFKB2,ADAR,MAPK12                                              |
| Type II Diabetes Mellitus Signaling                          | 1.97E+00             | 4.35E-02     | 1              | RELA,ABCC8,SLC27A1,NFKB2,MAPK12,Irs3                                |
| ILK Signaling                                                | 1.87E+00             | 3.72E-02     | 2.449          | RELA,MYH6,LIMS2,MYH14,NFKB2,MAPK12,Irs3                             |
| Protein Kinase A Signaling                                   | 1.73E+00             | 2.76E-02     | 0.333          | PLCD3,RELA,Hist1h1e,GYS1,PTPN23,DUSP1,PDE4A,PTPRS,LIPE,NFKB2,NFATC1 |

**Supplemental Table 7: Top Ten Activated Canonical Pathways in Genes Enriched in Male Cardiac Myocytes**

| Ingenuity Canonical Pathways                                                 | -log(p-value) | Ratio  | z-score | Molecules                                                                       |
|------------------------------------------------------------------------------|---------------|--------|---------|---------------------------------------------------------------------------------|
| Integrin Signaling                                                           | 5.81          | 0.0647 | 2.887   | PIK3R3,ITGB1,RAP1B,RALA,RND3,PIK3C2A,LIMS1,ARPC5L,ARPC2,TSPAN2,KRAS,CRK,PTEN    |
| Signaling by Rho Family GTPases                                              | 5.05          | 0.0551 | 2.333   | ITGB1,PIK3C2A,ARPC5L,SEPT7,GNAI1,PIK3R3,STMN1,GNAI3,CFL2,RND3,ARPC2,GNG12,SEPT2 |
| Rac Signaling                                                                | 4.23          | 0.0748 | 2.828   | ITGB1,PIK3R3,RPS6KB1,CFL2,PIK3C2A,ARPC5L,ARPC2,KRAS                             |
| Lymphotoxin I <sup>2</sup> Receptor Signaling                                | 4.17          | 0.107  | 1.633   | PIK3R3,CASP3,PIK3C2A,APAF1,CYCS,BIRC2                                           |
| PDGF Signaling                                                               | 4.1           | 0.0843 | 1.89    | PIK3R3,PIK3C2A,CRK,KRAS,JAK2,EIF2AK2,RASA1                                      |
| fMLP Signaling in Neutrophils                                                | 4.01          | 0.0696 | 2.646   | PIK3R3,GNAI3,PIK3C2A,ARPC5L,ARPC2,GNAI1,KRAS,GNG12                              |
| IL-8 Signaling                                                               | 3.89          | 0.0532 | 3       | PIK3R3,GNAI3,RPS6KB1,CCND2,RND3,PIK3C2A,GNAI1,KRAS,MAP4K4,GNG12                 |
| Mitotic Roles of Polo-Like Kinase                                            | 3.76          | 0.0909 | 2       | SLK,KIF23,PPP2R3A,PRC1,CCNB2,KIF11                                              |
| FcI <sup>3</sup> Receptor-mediated Phagocytosis in Macrophages and Monocytes | 3.62          | 0.0707 | 1.89    | PIK3R3,RPS6KB1,ARPC5L,ARPC2,DGKB,CRK,PTEN                                       |
| Insulin Receptor Signaling                                                   | 3.42          | 0.0571 | 2.121   | PIK3R3,PPP1R14C,RPS6KB1,PIK3C2A,CRK,KRAS,JAK2,PTEN                              |

**Supplemental Table 8: Genes Upregulated in Female Cardiac Myocytes with and without an ERE**

| Up In Female + ERE | Up In Female - ERE |
|--------------------|--------------------|
| Ier5l              | LOC310926          |
| Krt19              | Irs3               |
| Ass1               | Cyp2e1             |
| Map1s              | Csdc2              |
| Lrg1               | Gtpbp1             |
| Hist2h4            | Hlx                |
| Dmtn               | Fmn1               |
| Jak3               | Irf2bp1            |
| C4a                | Nr4a1              |
| Srebf1             | Hsf4               |
| Klf2               | Pdpx               |
| Foxk1              | Pla2g15            |
| Msln               | Hspa12b            |
| Repin1             | Hsppb1             |
| Ap5s1              | Hist1h1d           |
| Ahdc1              | Trim11             |
| Cad                | Pom121             |
| Prrc2a             | Wnk2               |
| Lrch4              | Synpo              |
| Ucp2               | Vps18              |
| Dyrk1b             | Shroom3            |
| Fmo1               | Rfx1               |
| Ptpn23             | Cbx7               |
| Atg2a              | Tbc1d25            |
| Nkx2-5             | Rbm42              |
| Adamts14           | Alpl               |
| Bcas3              | Rbm14              |
| Nckip5d            | Dyrk3              |
| Ier2               | Tysnd1             |
| Mn1                | Zbtb45             |
| Foxp3              | ApoE               |
| Tapbp              | Vasn               |
| Notch2             | Cnksr1             |
| Llgl2              | Zfp691             |
| Sts                | Por                |
| Dok7               | Bcl9l              |
| Eif3f              | Zfp423             |
| Angel1             | Zfp142             |

|            |
|------------|
| Pelp1      |
| Slc9a1     |
| Leng8      |
| Tacc2      |
| Colq       |
| Akap17a    |
| Scaf1      |
| Cand2      |
| Rabac1     |
| Cul9       |
| Corin      |
| Tmem214    |
| Wbp2       |
| Edc4       |
| Dus3l      |
| Raver1     |
| Nfkb2      |
| Plbd2      |
| Rnf123     |
| Gcat       |
| Aldoa      |
| Pacs1      |
| Zfp444     |
| RGD1310507 |
| Abcc8      |
| Per1       |
| Slc9a8     |
| Lims2      |
| Rela       |
| Slc27a1    |
| H6pd       |
| Tubb4b     |
| Usp10      |
| Npr2       |
| Inha       |
| Mgp        |
| Fitm2      |
| Ech1       |
| Acaa1a     |
| Afap1      |
| Mical1     |

|         |
|---------|
| Cx3cl1  |
| Tll12   |
| Jrk     |
| Disp1   |
| Arc     |
| Wdr81   |
| Ncln    |
| Rhbdf1  |
| Pbld1   |
| Dusp1   |
| Entpd6  |
| Usp19   |
| Itga7   |
| Acacb   |
| Rnf31   |
| Tle2    |
| Lipe    |
| Junb    |
| Jup     |
| Cyr61   |
| Exosc4  |
| Stard10 |
| Xab2    |
| Fbxw8   |
| Cog1    |
| Skiv2l  |
| Nup210  |
| Pld3    |
| Pc      |
| Nfatc1  |
| Tjap1   |
| Trappc9 |
| Alg2    |
| Zswim8  |
| Pcsk6   |
| Zfp36   |
| Sympk   |
| Asb2    |
| Gcn111  |
| Clcn6   |
| Foxj2   |

|         |
|---------|
| Syde1   |
| Nfic    |
| Mapk12  |
| Rhbdd2  |
| Irgg    |
| Sema4b  |
| Plekhf1 |
| Atg9a   |
| Agpat1  |
| Mocs1   |
| Fam65a  |
| Pde4a   |
| Pknox2  |
| Mroh1   |
| Jade2   |
| Nfix    |
| Top3b   |
| Akr7a2  |
| Gigyf1  |
| Bag6    |
| Milt1   |
| Sec24c  |
| Ubr4    |
| Lrp4    |
| Eif2b2  |
| Pcif1   |
| Cpsf3l  |
| Gpt     |
| Plcd3   |
| Pbxip1  |
| Creb3l2 |
| Cdh23   |
| Phldb1  |
| Ptov1   |
| Lzts2   |
| Abca2   |
| Mlycd   |
| Sec16a  |
| Gga3    |
| Slc35a4 |
| Ppt2    |

|         |
|---------|
| Tbc1d17 |
| Fbxo31  |
| Urgcp   |
| Mef2d   |
| Aarsd1  |
| Prpf8   |
| Usp36   |
| Xbp1    |
| Cpsf1   |
| Tnrc18  |
| Ptprs   |
| Med25   |
| Gstm2   |
| Camta2  |
| Gaa     |
| Plekhh3 |
| Cnot3   |
| Myo18a  |
| Ipo13   |
| Tmem115 |
| Sf3a1   |
| Mfge8   |
| Pwwp2b  |
| Rangap1 |
| Hhatl   |
| Oplah   |
| Myh6    |
| Tfeb    |
| Gga1    |
| Sqstm1  |
| Mypn    |
| Yipf3   |
| Vwf     |
| Scap    |
| Gys1    |
| Flad1   |
| Pomgnt2 |
| Vars    |
| Man2c1  |
| Des     |
| Frem2   |



|          |
|----------|
| Rogdi    |
| Thop1    |
| Zfyve1   |
| Naga     |
| Sec31a   |
| Fmc1     |
| Acsf2    |
| Fbxo21   |
| Ilvbl    |
| Nr1h2    |
| Scrib    |
| Caskin2  |
| Nucb1    |
| Chst15   |
| Hyou1    |
| Gorasp1  |
| Ppard    |
| Tmem109  |
| Ccdc97   |
| Tpcn1    |
| Slc4a3   |
| Emc10    |
| Ift172   |
| Bckdha   |
| Herpud1  |
| Tmem184b |
| Plekhn2  |
| Zer1     |

|          |
|----------|
| Tpra1    |
| Hcfc1    |
| Gstm1    |
| Bola1    |
| Grina    |
| Urb1     |
| Fgd1     |
| Myo1e    |
| Tbx5     |
| Myh14    |
| Hdac5    |
| Fiz1     |
| Crkl     |
| Atp13a1  |
| Slc25a34 |
| Plxnb2   |
| Slc3a2   |
| Ap2a1    |
| Cst3     |
| Lrrc4b   |
| Slc22a17 |
| Adar     |
| Hk1      |
| Amotl2   |
| Gata5    |
| Kcng2    |
| Fam73b   |
| Baz2a    |
| Sugp1    |
| Zfp710   |
| Nr1d1    |
| Snx33    |
| Abcd1    |
| Sf1      |
| Tln1     |
| Tns1     |
| Ighmbp2  |
| Ubc      |
| Tcof1    |
| Rab11b   |
| Tubgcp6  |

|       |
|-------|
| Ptms  |
| Sars2 |

**Supplemental Table 9: Genes Upregulated in Male Cardiac Myocytes with and without an ARE**

| <b>Up In Male + ARE</b> | <b>Up In Male -ARE</b> |
|-------------------------|------------------------|
| Prc1                    | Ddx3                   |
| Pbk                     | Eif2s3y                |
| Dbf4                    | Chrng                  |
| Htr2a                   | Sgol2                  |
| Cenpf                   | Cep55                  |
| Mki67                   | Casc5                  |
| Cep290                  | Aspa                   |
| Emp1                    | Lpar4                  |
| Arhgap11a               | Ndc80                  |
| Il1b                    | Kif11                  |
| Ccp110                  | Rrm2                   |
| Pik3c2a                 | Pde11a                 |
| C1qtnf6                 | Top2a                  |
| Ptbp3                   | Kif23                  |
| Pvrl3                   | Phactr3                |
| Abracl                  | Aspm                   |
| Sema3d                  | Irf6                   |
| Gnai3                   | Ccnb2                  |
| Casp8ap2                | Pycard                 |
| RGD1305110              | Tfr3                   |
| Nrep                    | Mest                   |
| Rab8b                   | Col3a1                 |
| Zdhhc21                 | Csrp2                  |
| LOC367515               | Fmr1                   |
| Prrg1                   | Csgalnact1             |
| Smc2                    | Loxl2                  |
| Trim37                  | Postn                  |
| Cd302                   | Dgkb                   |
| Ccng1                   | Tspan2                 |
| Idi1                    | Casp3                  |
| RGD1308706              | Fap                    |
| Mtf2                    | Mrc1                   |
| Rnd3                    | Klhl4                  |
| S100a10                 | Tmed5                  |
| Hopx                    | Kras                   |
| Col1a1                  | Vcan                   |
| Arrdc3                  | Arl5b                  |

|          |
|----------|
| Llph     |
| Myef2    |
| Pdcd4    |
| Eif1a    |
| Hmgn3    |
| Rala     |
| Myo9a    |
| Kpna5    |
| Ccnd2    |
| Tmtc3    |
| Gng12    |
| Syap1    |
| Arpc5l   |
| Usp1     |
| Mob1a    |
| Slk      |
| Pros1    |
| Uba3     |
| March7   |
| Tomm20   |
| Cyca     |
| Plekha3  |
| Mrpl18   |
| Tmem126a |
| Mex3c    |
| Mfap1a   |
| Cfl2     |
| Ccdc85a  |
| Psme4    |
| Btbd1    |
| Snap23   |
| Eif4e3   |
| Gkap1    |
| Rfc1     |
| Ralbp1   |
| Map4k4   |
| Ngrn     |
| Cast     |

|         |
|---------|
| Tlk1    |
| Cav2    |
| Sh3bgrl |
| Cd83    |
| Dock11  |
| Slc35a3 |
| Calcrl  |
| Rnf152  |
| Rcn1    |
| Bub1    |
| Prcp    |
| Kif5b   |
| Zfp367  |
| Gnai1   |
| Alg13   |
| Eif2ak2 |
| Nin     |
| Vps36   |
| Pten    |
| Mum1l1  |
| Dynlt3  |
| Rbbp8   |
| Ap3s1   |
| Sgce    |
| Tmod3   |
| Pank3   |
| Rps6kb1 |
| Cyp2j4  |
| Rasa1   |
| Csde1   |
| Gbp2    |
| Mospd2  |
| Col5a2  |
| Tmtc4   |
| Zhx1    |
| Pign    |
| Zdhhc17 |
| Htatsf1 |
| Jak2    |
| Larp1b  |
| Cmpk1   |

|                    |
|--------------------|
| Usp12              |
| Memo1              |
| Tlr3               |
| Bhlhb9             |
| Kctd18             |
| Cyb5r4             |
| Rb1cc1             |
| Nampt              |
| Cdv3               |
| Dstn               |
| Tceal8             |
| Emc2               |
| Hmgb2              |
| Bmi1               |
| Rab30              |
| Pik3r3             |
| Prkx               |
| Apaf1              |
| Ccz1b              |
| Chm                |
| Ankrd13c           |
| Tpk1               |
| Mlf1               |
| Nes                |
| Gadd45a            |
| Baz1a              |
| Anxa10             |
| Gabpa              |
| ENSRNOG00000030371 |
| Pds5a              |
| Azin1              |
| Serp1              |
| Rap1b              |
| Rmdn1              |
| Cops2              |
| Pigy               |
| Ap1s2              |
| Pon2               |
| Homer2             |
| Pdcd10             |
| Fbn1               |

|          |
|----------|
| Cggbp1   |
| Reep3    |
| Magi3    |
| Nr3c1    |
| Ptpla    |
| Rbm25    |
| Ergic2   |
| Ireb2    |
| Strn3    |
| Efnb2    |
| Rab6a    |
| Apool    |
| Vps4b    |
| Otud6b   |
| Lnpep    |
| Usp46    |
| Ppp1r14c |
| Atg4al1  |
| Rab21    |
| Tgfbr1   |
| Rnf2     |
| Ggct     |
| Sept2    |
| Nasp     |
| Phospho2 |
| Eapp     |
| Usp32    |
| Pafah1b1 |
| Tpt1     |
| Armcx3   |
| Birc2    |
| Dnaja1   |
| Ogfrl1   |
| Gpatch11 |
| Sept7    |
| Tulp4    |
| Phf10    |
| Capza1   |
| Kctd9    |
| Tdg      |
| Mib1     |

|                    |
|--------------------|
| Sh3glb1            |
| Evl                |
| Klf6               |
| Arpc2              |
| Acap2              |
| Nab1               |
| Ttc39b             |
| Tarsl2             |
| Ppat               |
| Usmg5              |
| Csnk1g3            |
| Mtx2               |
| Msantd3            |
| Setd2              |
| Mapk6              |
| Capza2             |
| Akirin1            |
| Smek1              |
| MGC95208           |
| Dnajc3             |
| Chd1               |
| Ugp2               |
| Guf1               |
| Rbm7               |
| Dld                |
| Chmp3              |
| Atf1               |
| Xpr1               |
| Picalm             |
| Gtf2h1             |
| ENSRNOG00000030700 |
| Hmgb1              |
| Slc12a2            |
| Usp25              |
| Canx               |
| March5             |
| Them4              |
| Minos1             |
| Atg3               |
| Plaa               |
| Crk                |

|            |
|------------|
| Frg1       |
| Cox6c      |
| Mtmr6      |
| RGD1308147 |
| Lims1      |
| Pdha1      |
| Ccdc43     |
| LOC499602  |
| Rab1a      |
| Rsrc2      |
| Wdr26      |
| Metap2     |
| Mrpl32     |
| Ppp2r3a    |
| Stmn1      |
| Cdk14      |
| Jtb        |
| Csnk1a1    |
| Ctps1      |
| Bche       |
| Itgb1      |
| Zfp148     |
| Mcts1      |
| Dnm1l      |



**Supplemental Table 10: DAVID Gene Ontology Analysis of ERE Containing Genes More Highly Expressed in Female Cardiac Myocytes**

| Keyword               | PValue     | Genes                                                                                                                                                                                                                                                                                                                                                                                              | Fold Enrichment |
|-----------------------|------------|----------------------------------------------------------------------------------------------------------------------------------------------------------------------------------------------------------------------------------------------------------------------------------------------------------------------------------------------------------------------------------------------------|-----------------|
| Osteogenesis          | 0.01621318 | MGP, NPR2, HIST2H4                                                                                                                                                                                                                                                                                                                                                                                 | 15.25905088     |
| Antiport              | 0.01733544 | SLC9A8, SLC4A3, SLC9A1                                                                                                                                                                                                                                                                                                                                                                             | 14.73287671     |
| Fatty acid metabolism | 0.00568615 | SLC27A1, ECH1, MLYCD, ACAA1A, ACSF2                                                                                                                                                                                                                                                                                                                                                                | 6.981265109     |
| Lysosome              | 0.0042892  | PLEKHF1, NAGA, PPT2, ABCA2, TPCN1, PLBD2                                                                                                                                                                                                                                                                                                                                                           | 5.621755588     |
| Lipid metabolism      | 3.04E-04   | SREBF1, SLC27A1, STS, ECH1, MLYCD, PLCD3, ACAA1A, ACSF2, AGPAT1, PLBD2                                                                                                                                                                                                                                                                                                                             | 4.654176739     |
| Ligase                | 0.01010702 | SLC27A1, RNF123, ASS1, GCAT, UBR4, ACSF2                                                                                                                                                                                                                                                                                                                                                           | 4.569555344     |
| Activator             | 0.00251343 | NR1H2, SREBF1, PTOV1, NOTCH2, PELP1, CREB3L2, NFIC, KLF2                                                                                                                                                                                                                                                                                                                                           | 4.33210063      |
| Golgi apparatus       | 0.00133814 | PACS1, SREBF1, NUCB1, RABAC1, SLC9A8, ATG9A, GORASP1, MSLN, AKR7A2, CHST15, SLC35A4                                                                                                                                                                                                                                                                                                                | 3.450651741     |
| Methylation           | 0.02060779 | PHLDB1, KRT19, RNF123, SEC31A, IFT172, PTPN23, PRRC2A, SLC4A3, HIST2H4                                                                                                                                                                                                                                                                                                                             | 2.642804689     |
| Acetylation           | 1.24E-05   | PACS1, IER2, ALDOA, ECH1, TMEM214, THOP1, EDC4, PRRC2A, ACSF2, BAG6, PELP1, RAVR1, EIF3F, AKR7A2, USP10, ACAA1A, AFAP1, DUS3L, TUBB4B, BCKDHA, ATG9A, UBR4, ROGDI, HIST2H4, HYOU1, MLYCD, IFT172, CAND2, GPT, REPIN1                                                                                                                                                                               | 2.407061547     |
| Ubl conjugation       | 0.00939789 | ALDOA, RNF123, SEC31A, MAPK12, PDE4A, IFT172, CREB3L2, CAND2, PER1, USP10, KLF2, SLC9A1, HIST2H4                                                                                                                                                                                                                                                                                                   | 2.343584186     |
| DNA-binding           | 0.00531095 | SREBF1, PPARD, FOXK1, FOXP3, HIST2H4, PKNOX2, NUCB1, NR1H2, MAP1S, CREB3L2, KLF2, NFIC, NKX2-5, TOP3B, REPIN1                                                                                                                                                                                                                                                                                      | 2.309477971     |
| Cytoplasm             | 4.23E-05   | CPSF3L, IER2, ALDOA, PTOV1, SLC27A1, LZTS2, SEC31A, THOP1, PTPN23, EDC4, PRRC2A, RABAC1, FAM65A, RNF123, BAG6, PBXIP1, PELP1, RAVR1, PDE4A, EIF3F, AKR7A2, PER1, USP10, MICAL1, AFAP1, TUBB4B, UBR4, NUCB1, PLEKHF1, NOTCH2, MAPK12, MAP1S, MLYCD, GPT, JAK3                                                                                                                                       | 2.068308418     |
| Zinc-finger           | 0.03560983 | PLEKHF1, NR1H2, PPARD, JADE2, RNF123, CUL9, UBR4, KLF2, ZFP444, ZFYVE1, DUS3L, REPIN1                                                                                                                                                                                                                                                                                                              | 2.012972554     |
| Nucleus               | 1.03E-04   | CPSF3L, IER2, SCAF1, PTOV1, PPARD, PTPN23, EDC4, PRRC2A, NR1H2, TMEM109, BAG6, PBXIP1, PELP1, RAVR1, CREB3L2, PER1, USP10, NKX2-5, SREBF1, UBR4, ROGDI, FOXP3, ZFP444, HIST2H4, PLEKHF1, PKNOX2, NOTCH2, MAPK12, MAP1S, IFT172, CAND2, NFIC, KLF2, REPIN1                                                                                                                                          | 2.007547877     |
| Transcription         | 0.04361491 | NR1H2, SREBF1, PTOV1, NOTCH2, PPARD, MAPK12, PELP1, CREB3L2, PER1, NFIC, FOXP3, KLF2                                                                                                                                                                                                                                                                                                               | 1.94648485      |
| Phosphoprotein        | 1.11E-06   | SCAF1, SLC9A8, LZTS2, SEC31A, THOP1, PTPN23, EDC4, BAG6, PBXIP1, PDE4A, RAVR1, AKR7A2, CREB3L2, MICAL1, USP10, SLC4A3, ATG9A, UBR4, MGP, HIST2H4, NUCB1, KRT19, PACS1, ALDOA, PTOV1, PHLDB1, ECH1, ASS1, ABCA2, PRRC2A, ANGEL1, FAM65A, RNF123, PELP1, GORASP1, EIF3F, NAGA, MSLN, PER1, AFAP1, DUS3L, TUBB4B, BCKDHA, SREBF1, NPR2, HYOU1, NOTCH2, MAPK12, MAP1S, GPT, JAK3, KLF2, SLC9A1, REPIN1 | 1.900311748     |
| Transport             | 0.04950823 | SLC9A8, SLC27A1, SEC31A, ATG9A, PTPN23, ABCA2, TPCN1, SLC35A4, TMEM109, BAG6, UCP2, GORASP1, SEC24C, SLC4A3, ABCC8, SLC9A1                                                                                                                                                                                                                                                                         | 1.689165998     |

**Supplemental Table 11: DAVID Gene Ontology Analysis Genes More Highly Expressed in Female Cardiac Myocytes Without EREs**

| Keyword               | PValue     | Genes                                                                                                                                                                                                                                                                                                                                                           | Fold Enrichment |
|-----------------------|------------|-----------------------------------------------------------------------------------------------------------------------------------------------------------------------------------------------------------------------------------------------------------------------------------------------------------------------------------------------------------------|-----------------|
| Biotin                | 0.04501792 | ACACB, PC                                                                                                                                                                                                                                                                                                                                                       | 43.31875        |
| Myosin                | 0.00492083 | MYO1E, MYH14, MYH6, MYO18A                                                                                                                                                                                                                                                                                                                                      | 11.55166667     |
| Cell adhesion         | 0.02324313 | JUP, VWF, ITGA7, PTPRS, MFGE8, CX3CL1, CYR61                                                                                                                                                                                                                                                                                                                    | 3.169664634     |
| Endoplasmic reticulum | 0.00300601 | PLD3, RHBDF1, CYP2E1, POR, SCAP, USP19, MAN2C1, POMGNT2, POM121, SQSTM1, XBP1, NUP210, NCLN                                                                                                                                                                                                                                                                     | 2.720501208     |
| Differentiation       | 0.04474315 | ZFP423, MEF2D, NR1D1, SQSTM1, XBP1, HLX, YIPF3                                                                                                                                                                                                                                                                                                                  | 2.707421875     |
| Methylation           | 0.03326286 | RBM42, DES, HIST1H1D, PLEKHH3, RAB11B, MYH6, SCAP, SYNPO, ADAR                                                                                                                                                                                                                                                                                                  | 2.411559278     |
| Transcription         | 0.01745449 | ZFP423, FOXJ2, TBX5, NR4A1, CBX7, XAB2, JUNB, HDAC5, IGHMBP2, MEF2D, NR1D1, XBP1, HLX, ADAR                                                                                                                                                                                                                                                                     | 2.07219533      |
| DNA-binding           | 0.02545353 | ZFP36, ZFP423, HIST1H1D, FOXJ2, TBX5, NR4A1, JUNB, IGHMBP2, MEF2D, NR1D1, XBP1, HLX, HSF4, ADAR                                                                                                                                                                                                                                                                 | 1.966905405     |
| Hydrolase             | 0.01363383 | PLD3, ALPL, PLA2G15, PDXP, PTPRS, HDAC5, IGHMBP2, USP19, MAN2C1, ATP13A1, DUSP1, OPLAH, GAA, ENTPD6, USP36, PCSK6, LIPE, ADAR                                                                                                                                                                                                                                   | 1.89409919      |
| Zinc                  | 0.01465685 | ZFP36, ALPL, ZFP423, FGD1, SF1, NR4A1, AARSD1, TRIM11, HDAC5, IGHMBP2, USP19, MAN2C1, TNS1, NR1D1, SQSTM1, PTMS, RNF31, ADAR                                                                                                                                                                                                                                    | 1.878885542     |
| Phosphoprotein        | 2.09E-04   | LRRC4B, AMOTL2, IGHMBP2, GSTM1, GSTM2, USP19, DES, OPLAH, APOE, CSDC2, CYR61, ZFP36, GTPBP1, ZFP423, RBM42, HIST1H1D, SLC3A2, MYH6, JUNB, SCAP, JUP, CRKL, PLEKHH3, UBC, PTMS, ALPL, HK1, VARS, XAB2, TRIM11, POM121, FBXW8, NR1D1, SQSTM1, XBP1, NUP210, GYS1, DYRK3, SYNPO, MYO1E, RHBDF1, NR4A1, AARSD1, HSPBP1, MEF2D, SUGP1, DUSP1, FBXO31, LIPE, PC, ADAR | 1.637699222     |
| Nucleus               | 0.04453901 | CBX7, XAB2, TRIM11, IGHMBP2, POM121, NR1D1, XBP1, SQSTM1, HLX, NUP210, DYRK3, HSF4, CSDC2, ZFP36, ZFP423, RBM42, HIST1H1D, FOXJ2, IPO13, TBX5, NR4A1, JUNB, MEF2D, SUGP1, DUSP1, UBC, ADAR                                                                                                                                                                      | 1.454734142     |
| Coiled coil           | 0.04104359 | FGD1, TLN1, TNRC18, CNOT3, HCFC1, RANGAP1, GCN1L1, AMOTL2, TJAP1, TRIM11, IGHMBP2, TUBGCP6, DES, XBP1, APOE, BAZ2A, FMNL1, ARC, VPS18, FOXJ2, TLE2, WNK2, MYH6, JUNB, SARS2, HDAC5, TNS1, MYH14, MYO18A                                                                                                                                                         | 1.438996277     |

**Supplemental Table 12: DAVID Gene Ontology Analysis of ARE Containing Genes More Highly Expressed in Male Cardiac Myocytes**

| Term          | PValue     | Genes                                                                                                                  | Fold Enrichment |
|---------------|------------|------------------------------------------------------------------------------------------------------------------------|-----------------|
| Prenylation   | 0.03509754 | RND3, RAB8B, RALA                                                                                                      | 10.05302176     |
| Cell division | 0.00353447 | GNAI3, RALBP1, CCND2, RALA, CCNG1                                                                                      | 7.912100457     |
| Cell cycle    | 0.00368608 | GNAI3, RALBP1, CCND2, UBA3, RALA, CCNG1                                                                                | 5.754254878     |
| Lipoprotein   | 0.02559419 | RND3, RAB8B, GNAI3, RALA, SNAP23, GNG12                                                                                | 3.553043032     |
| Coiled coil   | 0.03285654 | CCP110, PRC1, RALBP1, CCDC85A, CENPF, MYO9A, SMC2, TRIM37, MAP4K4, CASP8AP2, SLK, SYAP1, MFAP1A, CEP290, GKAP1, SNAP23 | 1.740118313     |

## Supplemental Table 13: DAVID Gene Ontology Analysis Genes More Highly Expressed in Male Cardiac Myocytes Without an ARE

| Term                    | PValue   | Genes                                                                                                                                                                                                                                                                                                                                                                                                                                                                                                                                                                             | Fold Enrichment |
|-------------------------|----------|-----------------------------------------------------------------------------------------------------------------------------------------------------------------------------------------------------------------------------------------------------------------------------------------------------------------------------------------------------------------------------------------------------------------------------------------------------------------------------------------------------------------------------------------------------------------------------------|-----------------|
| Pyrimidine biosynthesis | 0.040912 | CTPS1, CMPK1                                                                                                                                                                                                                                                                                                                                                                                                                                                                                                                                                                      | 47.91013825     |
| Prenylation             | 2.59E-04 | KRAS, DNAJA1, RAP1B, RAB6A, RAB21, GBP2, RAB1A                                                                                                                                                                                                                                                                                                                                                                                                                                                                                                                                    | 7.891081594     |
| TPR repeat              | 0.001318 | RMDN1, NASP, EMC2, DNAJC3, TMT4, TTC39B                                                                                                                                                                                                                                                                                                                                                                                                                                                                                                                                           | 7.3707905       |
| Mitosis                 | 1.44E-04 | CSNK1A1, SEPT2, PDS5A, JTB, PAFAH1B1, CEP55, SEPT7, RBBP8                                                                                                                                                                                                                                                                                                                                                                                                                                                                                                                         | 7.032680844     |
| SH2 domain              | 0.031356 | JAK2, PIK3R3, CRK, RASA1                                                                                                                                                                                                                                                                                                                                                                                                                                                                                                                                                          | 5.807289485     |
| Cell division           | 1.15E-04 | CSNK1A1, CHMP3, SEPT2, PDS5A, GNAI1, JTB, PAFAH1B1, CEP55, SEPT7, RBBP8                                                                                                                                                                                                                                                                                                                                                                                                                                                                                                           | 5.323348694     |
| GTP-binding             | 1.49E-05 | DNM1L, SEPT2, EIF2S3Y, GNAI1, RAB1A, KRAS, RAP1B, GUF1, RAB6A, SEPT7, ARL5B, GBP2, RAB21                                                                                                                                                                                                                                                                                                                                                                                                                                                                                          | 4.90418738      |
| Cell cycle              | 2.95E-06 | MAPK6, PAFAH1B1, GADD45A, MCTS1, SEPT7                                                                                                                                                                                                                                                                                                                                                                                                                                                                                                                                            | 4.839407904     |
| Isopeptide bond         | 7.47E-07 | HMGB1, NES, CHMP3, DNM1L, NASP, TGFB1, PHF10, ZFP148, NR3C1, ITGB1, ATG3, RSR2, RBBP8, PICALM, RNF2, CCDC43, NAB1, CSDE1, EIF2AK2, TOP2A                                                                                                                                                                                                                                                                                                                                                                                                                                          | 3.975945083     |
| Innate immunity         | 0.03856  | HMGB1, HMGB2, TLR3, JAK2, EIF2AK2                                                                                                                                                                                                                                                                                                                                                                                                                                                                                                                                                 | 3.927060512     |
| Chromosome              | 0.005145 | CSNK1A1, HMGB1, HMGB2, RNF2, FMR1, LOXL2, SEPT7, RBBP8                                                                                                                                                                                                                                                                                                                                                                                                                                                                                                                            | 3.813742348     |
| Apoptosis               | 0.002334 | CASP3, PDCD10, SH3GLB1, MGC95208, RNF152, TGFB1, JTB, RPS6KB1, APAF1, THEM4                                                                                                                                                                                                                                                                                                                                                                                                                                                                                                       | 3.497090383     |
| Actin-binding           | 0.031288 | PHACTR3, ARPC2, CAPZA2, CAPZA1, EVL, DSTN                                                                                                                                                                                                                                                                                                                                                                                                                                                                                                                                         | 3.422152732     |
| Ubl conjugation         | 2.17E-07 | CHMP3, AZIN1, NR3C1, ITGB1, CANX, RSR2, DSTN, PICALM, CCDC43, CSDE1, TOP2A, NES, DNM1L, TGFB1, NASP, FMR1, IREB2, PHF10, ZFP148, ATG3, RBBP8, MAPK6, RNF152, RNF2, NAB1, SGCE, EIF2AK2                                                                                                                                                                                                                                                                                                                                                                                            | 3.274870209     |
| Acetylation             | 5.91E-15 | CYB5R4, NAMPT, SEPT2, METAP2, CAPZA2, CAPZA1, RPS6KB1, CANX, RAB1A, DSTN, LNPEP, MINOS1, CASP3, PICALM, PDHA1, RAB6A, PPP1R14C, TOP2A, RAB21, EIF2S3Y, KIF5B, STRN3, FMR1, RBBP8, DLD, STMN1, CSNK1G3, EMC2, EIF2AK2, THEM4, SEPT7, HMGB1, HMGB2, CDV3, NR3C1, ITGB1, CMPK1, PPAT, PLAA, KRAS, ARPC2, SH3GLB1, CSDE1, DNAJA1, PAFAH1B1, RASA1, CSNK1A1, NES, DNM1L, PDCD10, PDS5A, NASP, ZFP148, CSRP2, ATG3, USMG5, RNF2, CRK                                                                                                                                                    | 3.131028753     |
| Protein transport       | 0.003839 | CHMP3, AP1S2, TMED5, NASP, AP3S1, RAB6A, ATG3, VPS36, RAB21, RAB1A, SERP1                                                                                                                                                                                                                                                                                                                                                                                                                                                                                                         | 3.002914648     |
| Golgi apparatus         | 0.002938 | CAV2, DNM1L, PDCD10, RAB1A, SLC35A3, ZDHHC17, TMED5, PICALM, SH3GLB1, SGCE, RAB6A, GBP2, RAB21                                                                                                                                                                                                                                                                                                                                                                                                                                                                                    | 2.743752411     |
| Endosome                | 0.044639 | HMGB1, CHMP3, ACAP2, ITGB1, VPS36, RAB21, RAB1A                                                                                                                                                                                                                                                                                                                                                                                                                                                                                                                                   | 2.715554395     |
| Cytoskeleton            | 0.001683 | CSNK1A1, SEPT2, KIF5B, GNAI1, RMDN1, CAPZA1, JTB, EVL, CEP55, NR3C1, ARPC2, SGCE, PAFAH1B1, STMN1, SEPT7                                                                                                                                                                                                                                                                                                                                                                                                                                                                          | 2.646968964     |
| Lipoprotein             | 0.004646 | APOOL, CHMP3, GNAI1, CANX, RAB1A, ZDHHC17, KRAS, TFRC, DNAJA1, RAP1B, RAB6A, GBP2, RAB21                                                                                                                                                                                                                                                                                                                                                                                                                                                                                          | 2.589737203     |
| Cytoplasm               | 5.02E-10 | NAMPT, COPS2, SEPT2, METAP2, CHMP3, CAPZA1, PDE11A, RPS6KB1, RAB1A, ASPA, CASP3, BHLHB9, TPT1, KIF5B, STRN3, FMR1, MAPK6, RRM2, SGCE, STMN1, CSNK1G3, EMC2, EIF2AK2, THEM4, MCTS1, SEPT7, GBP2, CAV2, HMGB1, HMGB2, CDV3, GNAI1, NR3C1, CEP55, CMPK1, DGKB, KRAS, ARPC2, SH3GLB1, CSDE1, DNAJA1, CHM, PAFAH1B1, VPS36, RASA1, CSNK1A1, DNM1L, PDCD10, RMDN1, NASP, JTB, IREB2, EVL, ATG3, HOMER2, JAK2, RAP1B, APAF1, CRK                                                                                                                                                         | 2.345807599     |
| Nucleotide-binding      | 1.93E-05 | KIF23, SEPT2, GNAI1, CTPS1, RPS6KB1, PRKX, RAB1A, CMPK1, DGKB, KRAS, VPS4B, GUF1, RAB6A, TOP2A, ARL5B, RAB21, CSNK1A1, MAGI3, DNM1L, EIF2S3Y, KIF11, KIF5B, TGFB1, DDX3, MAPK6, RAP1B, JAK2, APAF1, CSNK1G3, EIF2AK2, SEPT7, GBP2                                                                                                                                                                                                                                                                                                                                                 | 2.310662282     |
| Cell junction           | 0.024907 | MAGI3, ZDHHC17, DNM1L, ARPC2, TGFB1, FMR1, RAP1B, RPS6KB1, ITGB1, HOMER2, CHRNG                                                                                                                                                                                                                                                                                                                                                                                                                                                                                                   | 2.252185986     |
| Cell projection         | 0.047273 | SEPT2, ARPC2, FMR1, SGCE, EVL, THEM4, ITGB1, HOMER2, SEPT7                                                                                                                                                                                                                                                                                                                                                                                                                                                                                                                        | 2.251651406     |
| Kinase                  | 0.011438 | CSNK1A1, TGFB1, RPS6KB1, PRKX, CMPK1, DGKB, PANK3, MAPK6, JAK2, TLK1, CSNK1G3, PIK3R3, EIF2AK2, CDK14                                                                                                                                                                                                                                                                                                                                                                                                                                                                             | 2.202764977     |
| Methylation             | 0.03078  | KRAS, KIF5B, FMR1, DNAJA1, RAP1B, STMN1, RAB6A, NR3C1, PPP1R14C, RAB21, GBP2                                                                                                                                                                                                                                                                                                                                                                                                                                                                                                      | 2.173243384     |
| Mitochondrion           | 0.00961  | APOOL, DNM1L, PIGY, JTB, RPS6KB1, NR3C1, COX6C, MINOS1, USMG5, SH3GLB1, DLD, DNAJA1, PDHA1, GUF1, THEM4                                                                                                                                                                                                                                                                                                                                                                                                                                                                           | 2.171154301     |
| Phosphoprotein          | 6.92E-09 | NAMPT, COPS2, SEPT2, METAP2, CHMP3, CAPZA2, CAPZA1, PDE11A, RPS6KB1, CANX, RSR2, RAB1A, DSTN, LNPEP, CASP3, PICALM, CCDC43, TPT1, CALCRL, RAB6A, PDHA1, DNAJC3, PPP1R14C, TOP2A, MAGI3, EIF2S3Y, KIF5B, STRN3, ZHX1, FMR1, COX6C, RBBP8, MAPK6, RRM2, NAB1, DLD, ACAP2, VCAN, STMN1, CSNK1G3, EIF2AK2, THEM4, GADD45A, SEPT7, MCTS1, ZFP367, CAV2, HMGB1, HMGB2, CDV3, CEP55, NR3C1, ITGB1, CMPK1, PLAA, DGKB, SH3GLB1, DNAJA1, CSDE1, ARMCX3, PAFAH1B1, PIK3R3, RASA1, CSNK1A1, NES, DNM1L, PHACTR3, PDS5A, TGFB1, NASP, PHF10, EVL, ZFP148, MEMO1, TFRC, RNF2, JAK2, RAP1B, CRK | 1.87047241      |
| ATP-binding             | 0.021733 | CSNK1A1, KIF23, MAGI3, KIF11, KIF5B, TGFB1, CTPS1, DDX3, RPS6KB1, PRKX, CMPK1, DGKB, MAPK6, VPS4B, JAK2, CSNK1G3, APAF1, EIF2AK2, TOP2A                                                                                                                                                                                                                                                                                                                                                                                                                                           | 1.769276242     |
| Coiled coil             | 8.05E-04 | KIF23, HMGB1, CHMP3, OTUD6B, TCEAL8, CEP55, NR3C1, RSR2, ATF1, RAB1A, PICALM, SH3GLB1, RB1CC1, CCDC43, HTATS1, TLK1, PAFAH1B1, MTMR6, PIK3R3, VPS36, RBM25, NES, KIF11, PHACTR3, NIN, KIF5B, STRN3, NASP, EVL, NDC80, HOMER2, BIRC2, RBBP8, CSGALNACT1, BAZ1A, XPR1, ACAP2, MSANTD3, STMN1, EIF2AK2, GPATCH11, SEPT7, ZFP367, GBP2, ALG13                                                                                                                                                                                                                                         | 1.646396503     |
| Nucleus                 | 0.001845 | COPS2, HMGB1, CAV2, NAMPT, HMGB2, GNAI1, AZIN1, TCEAL8, NR3C1, CMPK1, ASPA, PICALM, BHLHB9, DNAJA1, CHD1, PAFAH1B1, LOXL2, TOP2A, VPS36, CSNK1A1, KLF6, MAGI3, PHACTR3, PDS5A, NASP, FMR1, ZHX1, GABPA, PHF10, ZFP148, CSRP2, RBBP8, MAPK6, RNF2, NAB1, JAK2, EMC2, EIF2AK2, SETD2, GADD45A, ZFP367                                                                                                                                                                                                                                                                               | 1.628785795     |
| Metal-binding           | 0.007328 | CYB5R4, CYP2J4, LIMS1, METAP2, GNAI1, COL3A1, PDE11A, NR3C1, ITGB1, CANX, PPAT, LNPEP, ASPA, DGKB, PHOSPHO2, DNAJA1, LOXL2, TOP2A, KLF6, TGFB1, ZHX1, IREB2, PHF10, ZFP148, CSRP2, MARCH5, MIB1, BAZ1A, RNF152, RNF2, RRM2, ACAP2, PON2, JAK2, ZFP367                                                                                                                                                                                                                                                                                                                             | 1.576732335     |

**Supplemental Figure 1: Differential gene expression is not observed when samples are randomly analyzed.** Differential gene expression analysis using DESeq was performed with the cardiac myocyte samples randomly assigned to two groups, not based on sex. This random analysis was performed three separate times (**A, B, C**). Statistically significant differentially expressed genes between the sexes are indicated by the red circles;  $\text{padj} < 0.05$ .

**Supplemental Figure 2: Genes involved in sexually dimorphic pathway activation contain EREs and AREs.** Position weight matrix (PWM) scanner analysis detected that of the genes significantly up-regulated in either female (**A**) or male (**B**) cardiac myocytes and contributed to the activated IPA pathway results (top), about half harbor EREs or AREs.

**Supplemental Figure 3: Genes more highly expressed in female cardiac myocytes are enriched for EREs and genes containing EREs cluster into distinct functional categories compared to genes without the response element.** Position weight matrix (PWM) scanner ERE analysis identified enrichment of EREs in genes that are more highly expressed in female cardiac myocytes (**A**). This finding that at least 148 female enriched genes contain EREs was statistically significant with  $p=0.0002$  using the hypergeometric probability calculator (<https://www.geneprof.org/GeneProf/tools/hypergeometric.jsp>). Gene ontology analysis using DAVID bioinformatics resources 6.8 functional annotation comparing genes up in females with or without an ERE revealed distinct biological keywords are enriched

depending on the presence of an ERE (**B**). The top ten enriched keywords in each group are shown with a  $p < 0.05$  and fold enrichment of at least 1.5.

**Supplemental Figure 4: Genes more highly expressed in male cardiac myocytes contain AREs and genes containing AREs cluster into distinct functional categories compared to genes without the response element.** Position weight matrix (PWM) scanner ARE analysis identified 75 genes that were more highly expressed in male myocytes also contain AREs (**A**). Gene ontology analysis using DAVID bioinformatics resources 6.8 functional annotation methods comparing genes up in males with or without an ARE revealed distinct biological keywords are enriched depending on the presence of an ARE (**B**). The top ten enriched keywords in each group are shown with a  $p < 0.05$  and fold enrichment of at least 1.5.

**Supplemental Figure 5: Genes that are not differentially expressed between sexes contain EREs/AREs.** Position weight matrix (PWM) scanner ARE and ERE analysis revealed that even genes that were not differentially expressed between the sexes contain hormone response elements. Additionally, genes more highly expressed in females contain AREs and genes enriched in males contain EREs (data not shown).

**Supplemental Figure 6: Sexually dimorphic expressed genes are not different between cardiac myocytes isolated from sham and ovariectomized (OVX) females.** Uterine weights were collected from 8 sham and 7 OVX animals at the time of cardiac myocyte isolation. Decreased uterine weight in the OVX animals reflect

decreased levels of circulating estrogen (**A**). \*\*\* $p < 0.001$  OVX relative to sham by unpaired t-test. Mean fold changes (OVX relative to sham) for expression of *Col3a1*, *Ccng1*, *Tfrc*, *Cox6c*, *Ucp2*, *Por*, and *Nr4a1* (**B**) as measured by qPCR in sham and OVX cardiac myocytes. All genes were normalized to levels of 18S; N= 8 sham females and 7 OVX females. All data reported as mean  $\pm$  SEM.

## Supplemental Figure 1: DESeq Randomization Experiment

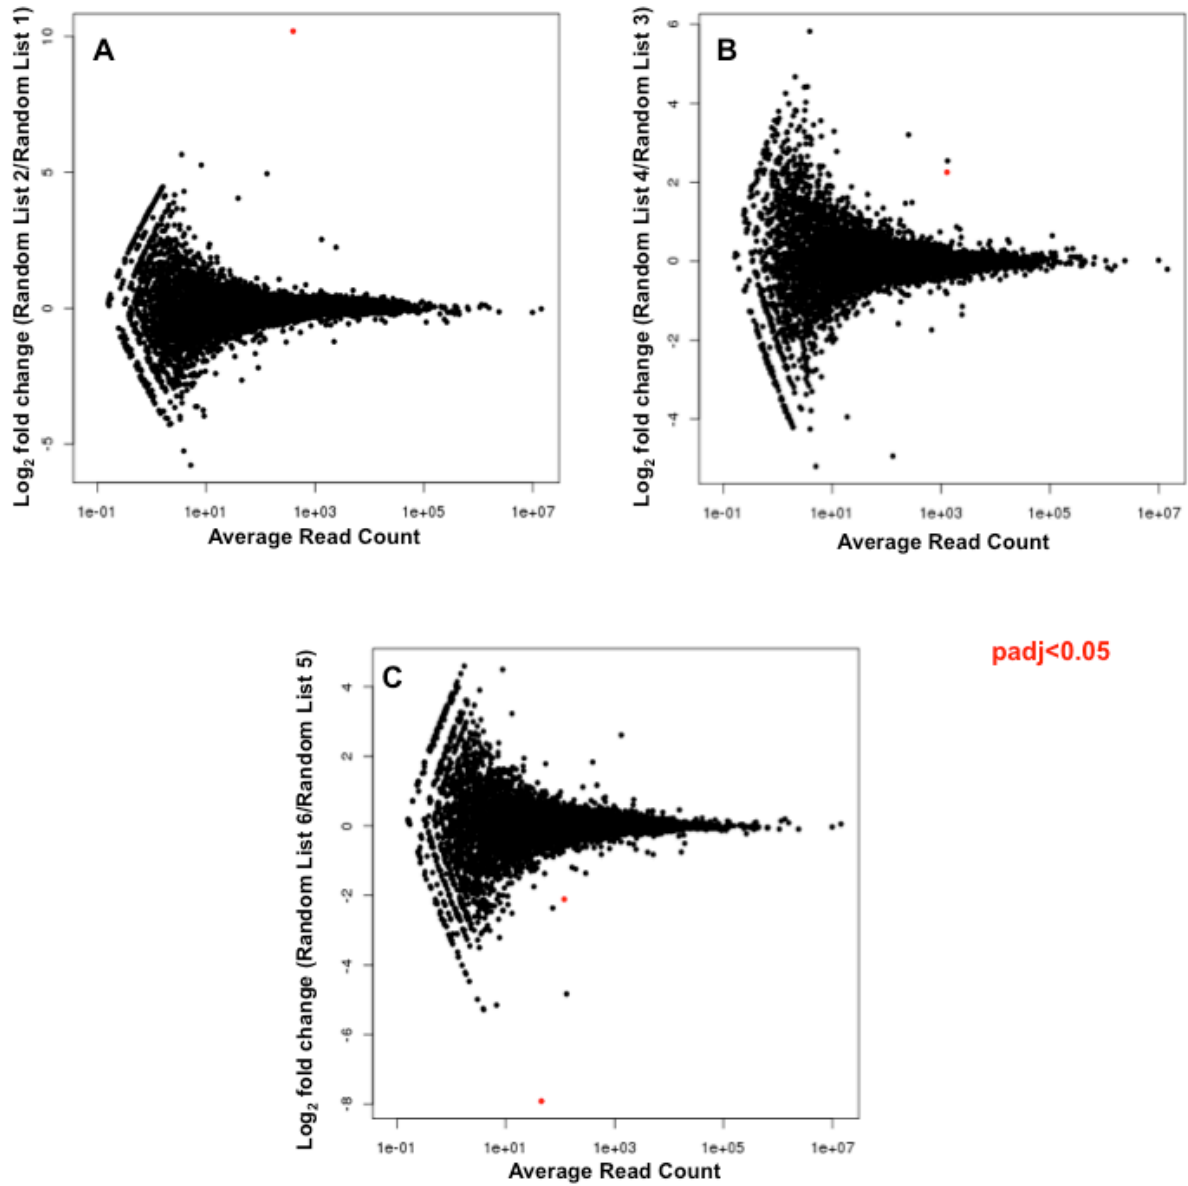



## Supplemental Figure 2

**A.** Canonical Pathways in Genes Up in Female

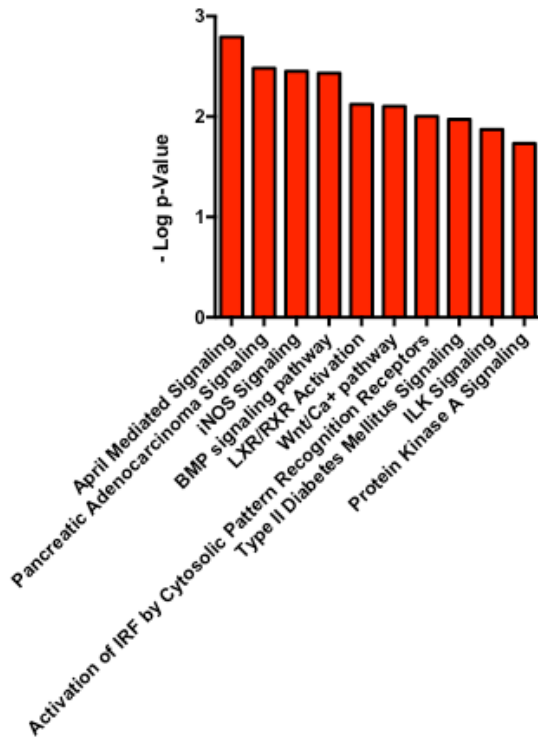

**B.** Canonical Pathways in Genes Up in Males

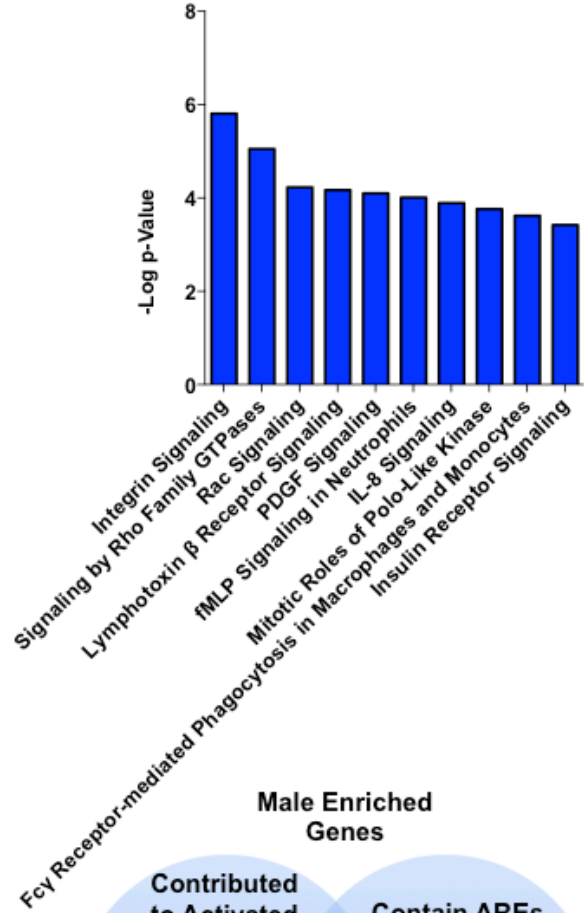

**Female Enriched Genes**

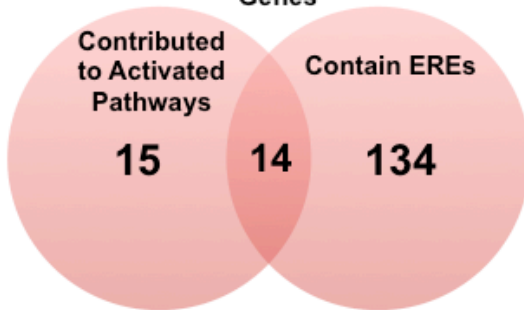

**Male Enriched Genes**

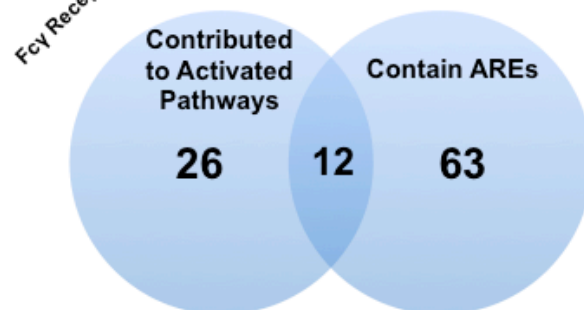

### Supplemental Figure 3

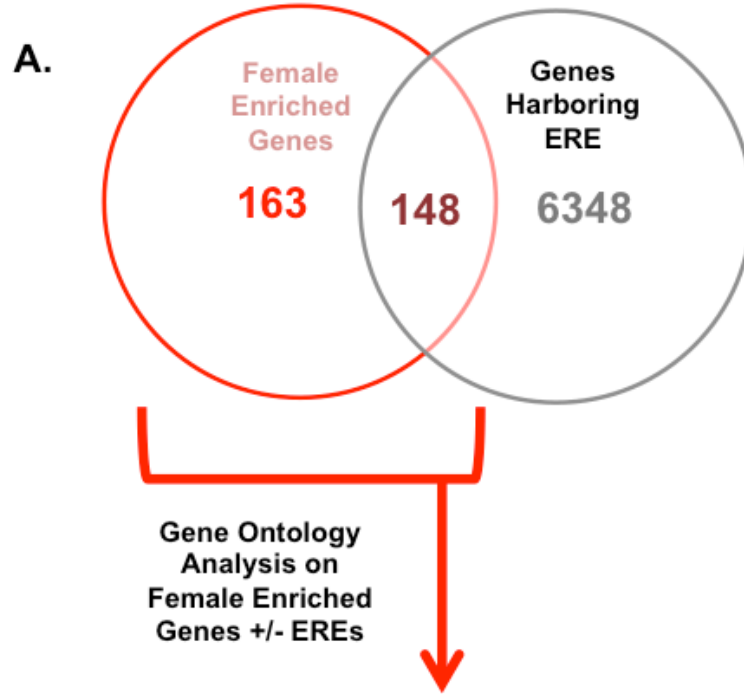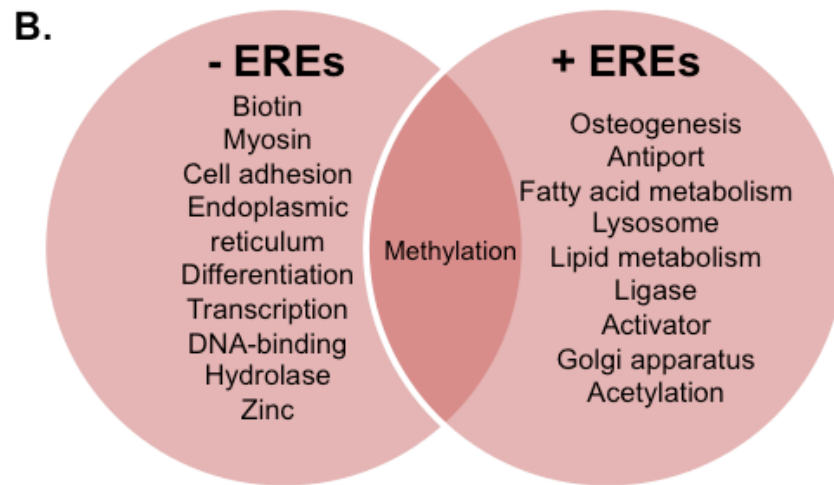

## Supplemental Figure 4

A.

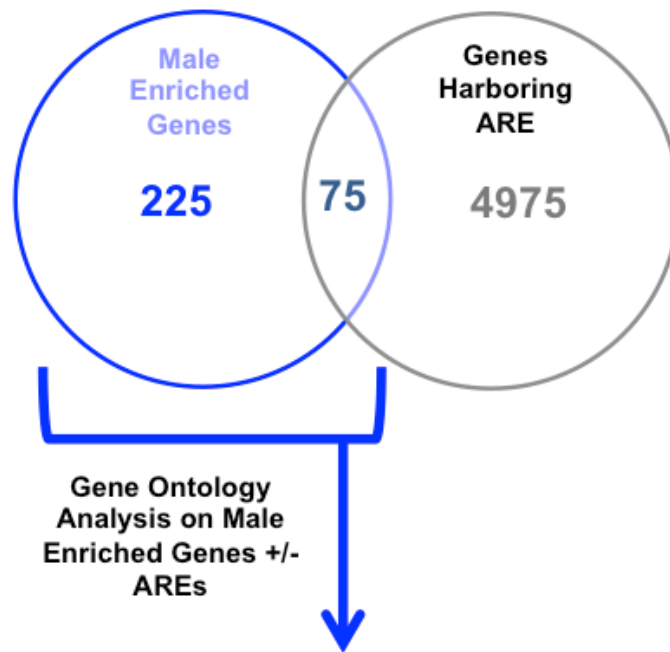

B.

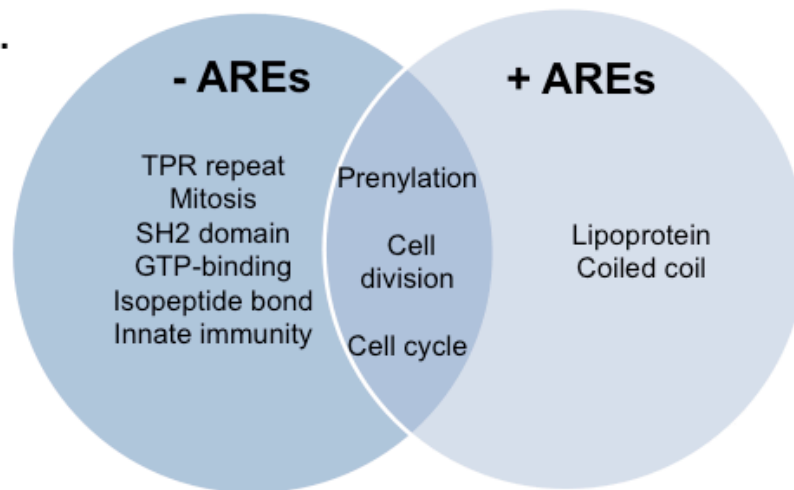

Supplemental Figure 5

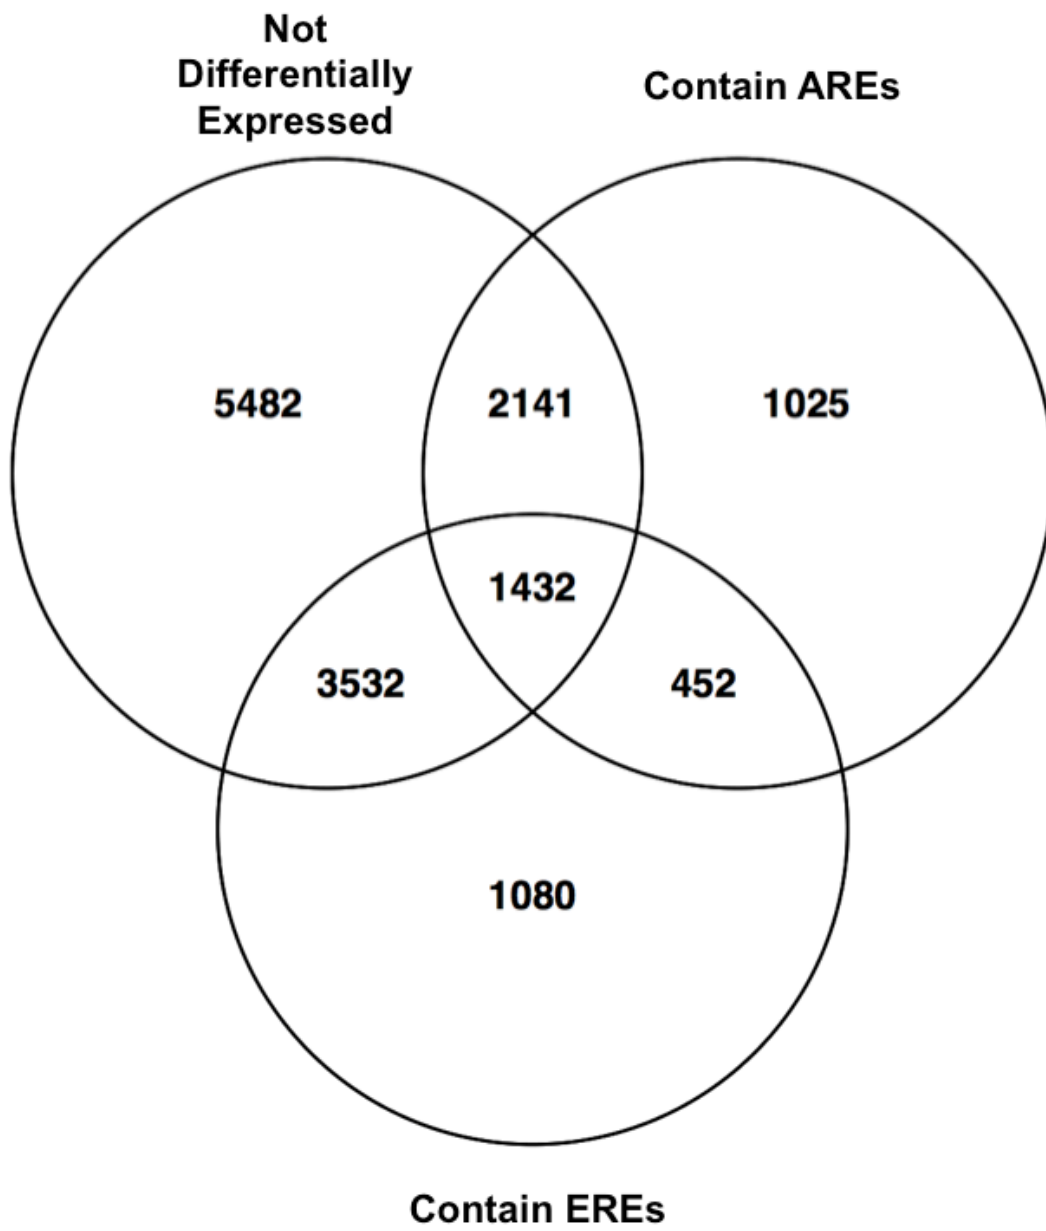

# Supplemental Figure 6

## A. Uterus Weight

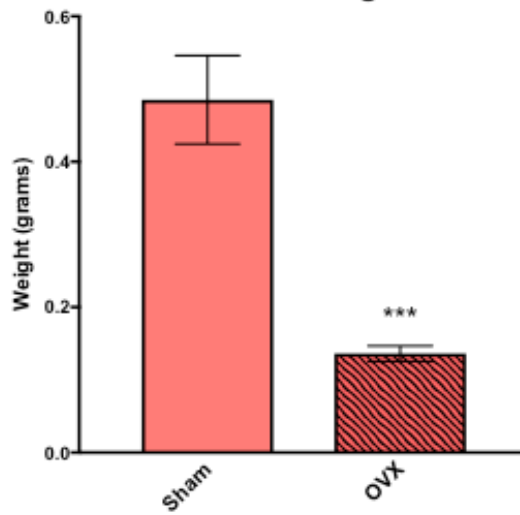

## B.

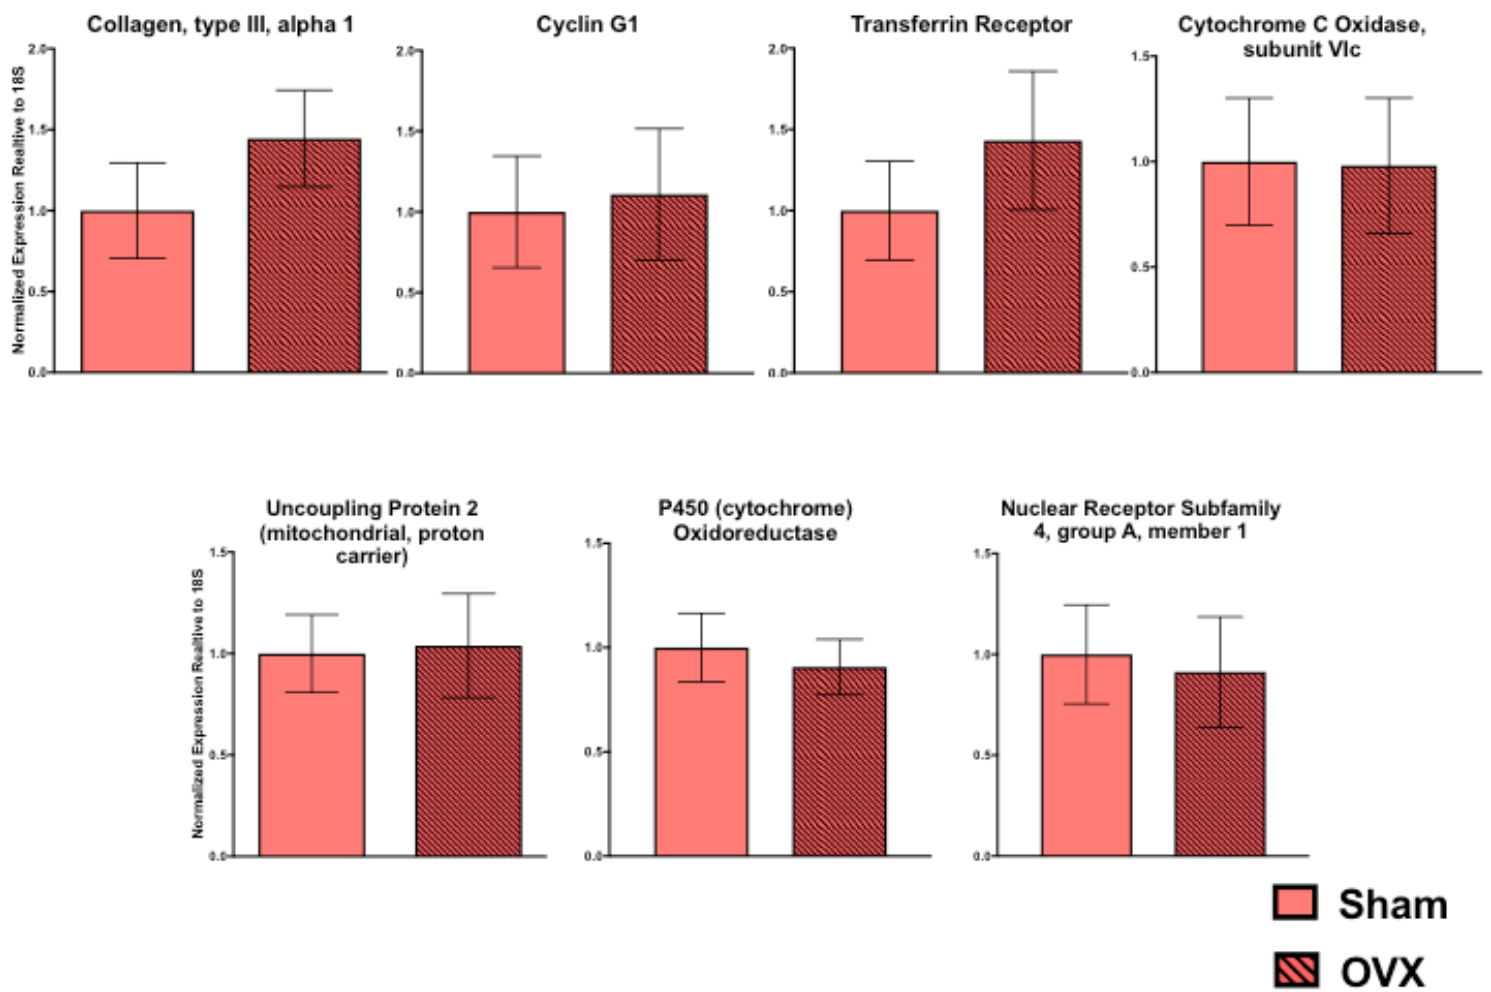

Supplement: NIHMS905671-supplement-001770_-_Supplemental_Material.pdf [file NIHMS905671-supplement-001770_-_Supplemental_Material.pdf]
